1     **Catch me if you can: Adaptation from**  
2     **standing genetic variation to a moving**  
3     **phenotypic optimum**

4     Sebastian Matuszewski<sup>\*§</sup>, Joachim Hermisson<sup>\*†</sup>, Michael Kopp<sup>‡</sup>

5                     February 24, 2015

---

\*Mathematics and BioSciences Group, Faculty of Mathematics, University of Vienna, A-1090 Vienna, Austria

§Current address: EPFL SV IBI-SV UP JENSEN, AAB 0 43 (Bâtiment AAB), Station 15, CH-1015 Lausanne, Switzerland

†Max F. Perutz Laboratories, A-1030 Vienna, Austria

‡Aix Marseille Université, CNRS, Centrale Marseille, I2M, UMR 7373, 13453, Marseille, France

6 **Running Head:** Adaptation from standing variation

7 **Keywords:** Adaptation, Standing Genetic Variation, Natural Selection, Models/Simulations,  
8 Population Genetics

9 **Corresponding author:**

10 EPFL SV IBI-SV UP JENSEN

11 AAB 0 43 (Bâtiment AAB), Station 15

12 CH-1015 Lausanne, Switzerland

13 Phone: +41 21 69 31490

14 Email: [sebastian.matuszewski@epfl.ch](mailto:sebastian.matuszewski@epfl.ch)

## ABSTRACT

15 Adaptation lies at the heart of Darwinian evolution. Accordingly, numerous studies have tried  
16 to provide a formal framework for the description of the adaptive process. Out of these, two  
17 complementary modelling approaches have emerged: While so-called adaptive-walk models  
18 consider adaptation from the successive fixation of *de-novo* mutations only, quantitative ge-  
19 netic models assume that adaptation proceeds exclusively from pre-existing standing genetic  
20 variation. The latter approach, however, has focused on short-term evolution of population  
21 means and variances rather than on the statistical properties of adaptive substitutions. Our  
22 aim is to combine these two approaches by describing the ecological and genetic factors that  
23 determine the genetic basis of adaptation from standing genetic variation in terms of the  
24 effect-size distribution of individual alleles. Specifically, we consider the evolution of a quan-  
25 titative trait to a gradually changing environment. By means of analytical approximations,  
26 we derive the distribution of adaptive substitutions from standing genetic variation, that is,  
27 the distribution of the phenotypic effects of those alleles from the standing variation that be-  
28 come fixed during adaptation. Our results are checked against individual-based simulations.  
29 We find that, compared to adaptation from *de-novo* mutations, (i) adaptation from standing  
30 variation proceeds by the fixation of more alleles of small effect; (ii) populations that adapt  
31 from standing genetic variation can traverse larger distances in phenotype space and, thus,  
32 have a higher potential for adaptation if the rate of environmental change is fast rather than  
33 slow.

## INTRODUCTION

34 One of the biggest surprises that has emerged from evolutionary research in the past few  
35 decades is that, in contrast to what has been claimed by the neutral theory (KIMURA 1983),  
36 adaptive evolution at the molecular level is wide-spread. In fact, some empirical studies  
37 concluded that up to 45% of all amino acid changes between *Drosophila simulans* and *D.*  
38 *yakuba* are adaptive (SMITH and EYRE-WALKER 2002; ORR 2005b). Along the same line,  
39 WICHMAN *et al.* (1999) evolved the single-stranded DNA bacteriophage  $\Phi$ X174 to high tem-  
40 perature and a novel host and found that 80 – 90% of the observed nucleotide substitutions  
41 had an adaptive effect. These and other results have led to an increased interest in providing  
42 a formal framework for the adaptive process that goes beyond traditional population- and  
43 quantitative-genetic approaches and considers the statistical properties of suites of substitu-  
44 tions in terms of “individual mutations that have individual effects” (ORR 2005a). In general,  
45 selection following a change in the environmental conditions may act either on *de-novo* muta-  
46 tions or on alleles already present in the population, also known as standing genetic variation.  
47 Consequently, from the numerous studies that have attempted to address this subject, two  
48 complementary modelling approaches have emerged.

49 So-called adaptive-walk models (GILLESPIE 1984; KAUFFMAN and LEVIN 1987; ORR 2002,  
50 2005b) typically assume that selection is strong compared to mutation, such that the popula-  
51 tion can be considered monomorphic all the time and all observed evolutionary change is the  
52 result of *de-novo* mutations. These models have produced several robust predictions (ORR  
53 1998, 2000; MARTIN and LENORMAND 2006a,b), which are supported by growing empirical  
54 evidence (COOPER *et al.* 2007; ROCKMAN 2012; HIETPAS *et al.* 2013; but see BELL 2009),  
55 and has provided a statistical framework for the fundamental event during adaptation, that  
56 is, the substitution of a resident allele by a beneficial mutation. Specifically, the majority  
57 of models (e.g., GILLESPIE 1984; ORR 1998; MARTIN and LENORMAND 2006a) consider the  
58 effect-size distribution of adaptive substitutions following a sudden change in the environ-

59 ment. Recently, KOPP and HERMISSON (2009b) and MATUSZEWSKI *et al.* (2014) extended  
60 this framework to gradual environmental change.

61 In contrast, most quantitative-genetic models consider an essentially inexhaustible pool of  
62 pre-existing standing genetic variants as the sole source for adaptation (LANDE 1976). Evolv-  
63 ing traits are assumed to have a polygenic basis, where many loci contribute small individual  
64 effects, such that the distribution of trait values approximately follows a Gaussian distribution  
65 (BULMER 1980; BARTON and TURELLI 1991; KIRKPATRICK *et al.* 2002). Since the origins  
66 of quantitative genetics lie in the design of plant and animal breeding schemes (WRICKE and  
67 WEBER 1986; TOBIN *et al.* 2006; HALLAUER *et al.* 2010), the traditional focus of these mod-  
68 els was on predicting short-term changes in the population mean phenotype (often assuming  
69 constant genetic variances and covariances), and not on the fate and effect of individual  
70 alleles. The same is true for the relatively small number of models that have studied the  
71 contribution of new mutations in the response to artificial selection (e.g. HILL and RASBASH  
72 1986a) and the shape and stability of the  $\mathbf{G}$ -matrix (i.e., the additive variance-covariance  
73 matrix of genotypes; JONES *et al.* 2004, 2012).

74 It is only in the past decade that population geneticists have thoroughly addressed adaptation  
75 from standing genetic variation at the level of individual substitutions (ORR and BETAN-  
76 COURT 2001; HERMISSON and PENNINGS 2005; CHEVIN and HOSPITAL 2008). HERMISSON  
77 and PENNINGS (2005) calculated the probability of adaptation from standing genetic vari-  
78 ation following a sudden change in the selection regime. They found that, for small-effect  
79 alleles, the fixation probability is considerably increased relative to that from new mutations.  
80 Furthermore, CHEVIN and HOSPITAL (2008) showed that the selective dynamics at a focal  
81 locus are substantially affected by genetic background variation. These results were experi-  
82 mentally confirmed by LANG *et al.* (2011), who followed beneficial mutations in hundreds of  
83 evolving yeast populations and showed that the selective advantage of a mutation plays only a  
84 limited role in determining its ultimate fate. Instead, fixation or loss is largely determined by  
85 variation in the genetic background – which need not to be preexisting, but could quickly be

86 generated by a large number of new mutations. Still, predictions beyond these single-locus  
87 results have been verbal at best, stating that “compared with new mutations, adaptation  
88 from standing genetic variation is likely to lead to faster evolution [and] the fixation of more  
89 alleles of small effect [...]” (BARRETT and SCHLUTER 2008). Thus, despite recent progress,  
90 one of the central questions still remains unanswered: From the multitude of standing genetic  
91 variants segregating in a population, which are the ones that ultimately become fixed and  
92 contribute to adaptation, and how does their distribution differ from that of (fixed) *de-novo*  
93 mutations?

94 The aim of the present article is to contribute to overcoming what has been referred to as “the  
95 most obvious limitation” (ORR 2005b) of adaptive-walk models and to study the ecological  
96 and genetic factors that determine the genetic basis of adaptation from standing genetic vari-  
97 ation. Specifically, we consider the evolution of a quantitative trait in a gradually changing  
98 environment. We develop an analytical framework that accurately describes the distribu-  
99 tion of adaptive substitutions from standing genetic variation and discuss its dependence on  
100 the effective population size, the strength of selection and the rate of environmental change.  
101 In line with BARRETT and SCHLUTER (2008), we find that, compared to adaptation from  
102 *de-novo* mutations, adaptation from standing genetic variation proceeds, on average, by the  
103 fixation of more alleles of small effect. Furthermore, when standing genetic variation is the  
104 sole source for adaptation, faster environmental change can enable the population to remain  
105 better adapted and to traverse larger distances in phenotype space.

## MODEL AND METHODS

### 106 **Phenotype, Selection and Mutation**

107 We consider the evolution of a diploid population of  $N$  individuals with discrete and non-  
108 overlapping generations characterized by a single phenotypic trait  $z$ , which is under Gaussian  
109 stabilizing selection with regard to a time-dependent optimum  $z_{\text{opt}}(t)$ :

$$w(z, t) = \exp \left[ -\frac{(z - z_{\text{opt}}(t))^2}{2\sigma_s^2} \right], \quad (1)$$

110 where  $\sigma_s^2$  describes the width of the fitness landscape. Throughout this paper we choose the  
111 linearly moving optimum,

$$z_{\text{opt}}(t) = vt, \quad (2)$$

112 where  $v$  is the rate of environmental change.

113 Mutations enter the population at rate  $\frac{\Theta}{2}$  (with  $\Theta = 4Nu$  where  $u$  is the per-haplotype muta-  
114 tion rate), and we assume that their phenotypic effect size  $\alpha$  follows a Gaussian distribution  
115 with mean 0 and variance  $\sigma_m^2$  (which we will refer to as the distribution of new mutations),  
116 that is

$$p(\alpha) = \frac{1}{\sqrt{2\pi\sigma_m^2}} \exp \left( -\frac{\alpha^2}{2\sigma_m^2} \right). \quad (3)$$

117 Throughout this paper we equate genotypic with phenotypic values and, thus, neglect any  
118 environmental variance. Note that this model is, so far, identical to the moving-optimum  
119 model proposed by KOPP and HERMISSON (2009b) (see also BÜRGER 2000).

### 120 **Genetic assumptions and simulation model**

121 To study the distribution of adaptive substitutions from standing genetic variation, we con-

122 ducted individual-based simulations (IBS; available upon request; see BÜRGER 2000; KOPP  
123 and HERMISSON 2009b) that explicitly model the simultaneous evolution at multiple loci,  
124 while making additional assumptions about the genetic architecture of the selected trait, the  
125 life cycle of individuals and the regulation of population size. This will serve as our main  
126 model.

127 **Genome** Individuals are characterized by a linear (continuous) genome of diploid loci,  
128 which determine the phenotype  $z$  additively (i.e., there is no phenotypic epistasis; note,  
129 however, that there is epistasis for fitness). Mutations occur at constant rate  $\frac{\Theta}{2N} = u$  per  
130 haplotype. In contrast to the majority of individual-based models (e.g., JONES *et al.* 2004;  
131 KOPP and HERMISSON 2009b; MATUSZEWSKI *et al.* 2014), we do not fix the number of  
132 loci *a-priori*, but instead assume that each mutation creates a unique polymorphic locus,  
133 whose position is drawn randomly from a uniform distribution over the entire genome (where  
134 genome length is determined by the recombination parameter  $r$  described below). Thus, each  
135 locus consists only of a wild-type allele with phenotypic effect 0 and a mutant allele with  
136 phenotypic effect  $\alpha$ , which is drawn from equation (3). Thus, we effectively design a bi-allelic  
137 infinite-sites model with a continuum of alleles.

138 To monitor adaptive substitutions, we introduce a population-consensus genome  $\mathcal{G}$  that keeps  
139 track of all loci, that is, of all mutant alleles that are segregating in the population. If a  
140 mutant allele becomes fixed in the population it is declared the new wild-type allele and its  
141 phenotypic effect is reset to 0. The phenotypic effects of all fixed mutations are taken into  
142 account by a variable  $z_{\text{fix}}$ , which can be interpreted as a phenotypic baseline effect. Thus,  
143 the phenotype  $z$  of an individual  $i$  is given by

$$z_i = z_{\text{fix}} + \sum_{h \in \{1,2\}} \sum_{l \in \mathcal{G}} \mathbb{1}(i, l, h) \alpha_l.$$

144 where



$$\mathbb{1}(i, l, h) = \begin{cases} 1 & \text{if individual } i \text{ carries mutant allele } \alpha \text{ at locus } l \text{ on haplotype } h \\ 0 & \text{otherwise.} \end{cases}$$

145 **Life cycle** Each generation, the following steps are performed:

- 146 1. *Viability selection*: Individuals are removed with probability  $1 - w(z)$  (see eq. 1).
- 147 2. *Population regulation*: If, after selection, the population size  $N$  exceeds the carrying  
148 capacity  $K$ ,  $N - K$  randomly chosen individuals are removed.
- 149 3. *Reproduction*: The surviving individuals are randomly assigned to mating pairs, and  
150 each mating pair produces exactly  $2B = 4$  offspring. Note that under this scheme, the  
151 effective population size  $N_e$  equals  $4/3$  times the census size (BÜRGER 2000, p. 274). To  
152 account for this difference,  $\Theta$  in the analytical approximations needs to be calculated on  
153 the basis of this effective size, i.e.,  $\Theta = 4N_e u$ . The offspring genotypes are derived from  
154 the parent genotypes by taking into account segregation, recombination and mutation.

155 **Recombination** For each reproducing individual, the number of crossing-over events dur-  
156 ing gamete formation (i.e., the number of recombination breakpoints) is drawn from a Poisson  
157 distribution with (genome-wide recombination) parameter  $r$  (i.e., the total genome length is  
158  $r \cdot 100\text{cM}$ , see Supporting Information 1). The genomic position of each recombination break-  
159 point is then drawn from a uniform distribution over the entire genome, and the offspring  
160 haplotype is created by alternating between the maternal and paternal haplotype depending  
161 on the recombination breakpoints. Free recombination (where all loci are assumed to be  
162 unlinked) corresponds to  $r \rightarrow \infty$ . In this case, for each locus a Bernoulli-distributed random  
163 number is drawn to determine whether the offspring haplotype will receive the maternal or  
164 the paternal allele at that locus.

165 **Simulation initialization and termination** Starting from a population of  $K$  wild-type  
166 individuals with phenotype  $z = 0$  (i.e., the population was perfectly adapted at  $t = 0$ ),  
167 we allowed for the establishment of genetic variation,  $\sigma_g^2$ , by letting the population evolve  
168 for 10,000 generations under stabilizing selection with a constant optimum. Increasing the  
169 number of generations had no effect on the average  $\sigma_g^2$ . Following this equilibration time, the  
170 optimum started moving under ongoing mutational input, and the simulation was stopped  
171 once all alleles from the standing genetic variation had either been fixed or lost (i.e., when  
172  $\sigma_{sgv}^2 = 0$ ). Simulations were replicated until a total number of 5000 adaptive substitutions  
173 from standing genetic variation was recorded.

## 174 **Analytical approximations: Evolution of a focal locus in the presence of genetic** 175 **background variation**

176 In order to obtain an analytically tractable model, we need to approximate the multi-locus  
177 dynamics. Clearly, simple interpolation of single locus theory will fail, because when alleles  
178 at different loci influencing the same trait segregate in the standing genetic variation, the  
179 selective dynamics of any individual allele are critically affected by the collective evolutionary  
180 response at other loci. In particular, any allele that brings the mean phenotype closer to the  
181 optimum simultaneously decreases the selective advantage of other such alleles (epistasis for  
182 fitness). Thus, if simultaneous evolution at many loci allows the population to closely follow  
183 the optimum, large-effect alleles at any given locus are likely to remain deleterious (as their  
184 carriers would overshoot the optimum). To account for these effects, we adopt a quantitative-  
185 genetics approach originally developed by LANDE (1983) and introduce a genetic background  
186  $z_B$  that evolves according to Lande's equation

$$\Delta \bar{z} = \sigma_g^2 \beta, \quad (5a)$$

187 where

$$\beta = \frac{\partial \log(\bar{w})}{\partial \bar{z}} \quad (5b)$$

188 denotes the selection gradient, which measures the change in log mean fitness per unit change  
189 of the mean phenotype and  $\sigma_g^2$  gives the genetic variance (LANDE 1976). Furthermore,  
190 assuming that the distribution of phenotypic values from the genetic background is Gaussian  
191 and the genetic variance remains constant, the mean background phenotype evolves according  
192 to

$$\bar{z}_B(t) \approx vt - \frac{v}{\gamma}(1 - (1 - \gamma)^t) \quad (6a)$$

193 with

$$\gamma = \frac{\sigma_g^2}{\sigma_g^2 + \sigma_s^2} \quad (6b)$$

194 (BÜRGER and LYNCH 1995).

195 Given the dynamics of the genetic background, we choose one focal locus and derive the  
196 time-dependent selection coefficient  $s(\alpha, t)$  for an allele with phenotypic effect  $\alpha$  (for details  
197 see below). We then use theory for adaptation from standing genetic variation (HERMISSON  
198 and PENNINGS 2005) and for fixation under time-inhomogeneous selection (UECKER and  
199 HERMISSON 2011) to estimate the fixation probability for this allele (see also Appendix 1).  
200 As long as there is no linkage (i.e., there is free recombination between *all* loci), each locus  
201 can be viewed as the focal locus (with a specific phenotypic effect  $\alpha$ ), allowing us to get an  
202 estimate for the overall distribution of adaptive substitutions from standing genetic varia-  
203 tion. Thus, in these approximations, our multi-locus model is effectively treated within a  
204 single-locus framework. Note that a similar focal-locus approach has recently been used to  
205 analyze the effect of genetic background variation on the trajectory of an allele sweeping to  
206 fixation (CHEVIN and HOSPITAL 2008), and to study the probability of adaptation to novel

207 environments (GOMULKIEWICZ *et al.* 2010), with both studies stressing the fact that genetic  
208 background variation cannot be neglected and critically affects the adaptive outcome.

### 209 **Wright-Fisher simulations: A focal locus with recurrent mutations**

210 To simulate evolution at a focal locus, we followed HERMISSON and PENNINGS (2005) and  
211 implemented a multinomial Wright-Fisher (WF) sampling approach (available upon request).  
212 These simulations serve as an additional analysis tool that has been adjusted to the approx-  
213 imation method and allows the adaptive process to be simulated fast and efficiently. In  
214 addition, they go beyond the individual-based model in one aspect, as they do not make the  
215 infinite-sites assumption but allow for recurrent mutation at the focal locus.

216 **Genome** At the focal locus, mutations with a fixed allelic effect  $\alpha$  appear recurrently  
217 at rate  $\theta$  and convert ancestral alleles into derived mutant alleles. Accordingly, despite a  
218 genetic background with normally distributed genotypic values, there are at most two types  
219 of (focal) alleles in the population, where each type “feels” only the mean background  $\bar{z}_B$ ,  
220 which evolves according to Lande’s equation (eq. 5, see above). The genetic background  
221 variation  $\sigma_g^2$  is assumed to be constant and serves as a free parameter that is independent of  
222  $\theta$ ,  $N_e$  and  $\sigma_s^2$ . Note that the evolutionary response at the focal locus is influenced by that of  
223 the genetic background, and vice versa, meaning that the two are interdependent.

224 **Procedure** We follow the evolution of  $2N_e$  alleles at the focal locus. Each generation is  
225 generated by multinomial sampling, where the probability of choosing an allele of a given type  
226 (ancestral or derived) is weighted by its respective (marginal) fitness. Furthermore, the mean  
227 phenotype of the genetic background  $\bar{z}_B$  evolves deterministically according to equation (5)  
228 with constant  $\sigma_g^2$ . To let the population reach mutation-selection-drift equilibrium, each  
229 simulation is started  $4N_e$  generations before the environment starts changing. Initially, the  
230 population consists of only ancestral alleles “0”; the derived allele “1” is created by mutation.

231 If the derived allele reaches fixation before the environmental change (by drift), it is itself  
 232 declared “ancestral”; i.e., the population is set back to the initial state. After  $4N_e$  generations,  
 233 the optimum starts moving, such that the selection coefficient of the derived allele, which is  
 234 initially deleterious (i.e.,  $s(\alpha, t) \leq 0$ ), increases and may eventually become beneficial (i.e.,  
 235  $s(\alpha, t) > 0$ ), depending on the response at the genetic background. Simulations continue until  
 236 the derived allele is either fixed or lost. Fixation probabilities are estimated from 100,000  
 237 simulation runs.

238 Both simulation programs are written in C++ and make use of the Gnu Scientific Library  
 239 (GALASSI *et al.* 2009). Mathematica (Wolfram Research, Inc., Champaign, USA) was used  
 240 for the numerical evaluation of integrals and to create plots and graphics, making use of the  
 241 LevelScheme package (CAPRIO 2005).

242 A summary of our notation is given in Table 1.

**Table 1** – A summary of notation and definitions.

|                    |                                                                                           |
|--------------------|-------------------------------------------------------------------------------------------|
| $\alpha$           | phenotypic effect of mutation                                                             |
| $p(\alpha)$        | (Gaussian) distribution of new mutations                                                  |
| $z$                | phenotype                                                                                 |
| $\bar{z}_B$        | mean genetic background phenotype                                                         |
| $v$                | rate of environmental change                                                              |
| $w(z, z_{opt}(t))$ | (Gaussian) fitness function                                                               |
| $\sigma_s^2$       | width of Gaussian fitness function                                                        |
| $\sigma_m^2$       | variance of new mutations                                                                 |
| $\sigma_g^2$       | (background) genetic variance                                                             |
| $s(\alpha, t)$     | time-dependent selection coefficient for allele with phenotypic effect $\alpha$           |
| $x$                | frequency of mutant allele                                                                |
| $N_e$              | effective population size                                                                 |
| $\theta$           | per locus mutation rate                                                                   |
| $\Theta$           | population-wide mutation rate (per trait)                                                 |
| $\Pi_{fix}$        | fixation probability                                                                      |
| $\rho(x, \alpha)$  | Distribution of mutant allele frequency at a single locus with phenotypic effect $\alpha$ |
| $P_{SGV}$          | Probability to adapt from standing genetic variation                                      |
| $p_{SGV}$          | Distribution of adaptive substitutions from standing genetic variation                    |
| $\delta_{eq}$      | equilibrium lag                                                                           |

## RESULTS

243 In the following, we calculate, first, the probability that a focal allele from the standing genetic  
244 variation becomes fixed when the population adapts to a moving phenotypic optimum, and  
245 second, the effect-size distribution of such alleles. Note that the first result will be derived  
246 under the assumption of recurrent mutation (see “Wright-Fisher simulations”), and serves  
247 as an intermediate step for the second result, which is based on an infinite-sites model (see  
248 “Genetic assumptions and simulation model”).

### 249 **The probability for adaptation from standing genetic variation**

250 The probability that a focal mutant allele from the standing genetic variation contributes to  
251 adaptation depends on the dynamics of its the selection coefficient in the presence of genetic  
252 background variation. For an allele with effect  $\alpha$  and a genetic background with mean  $\bar{z}_B$   
253 and variance  $\sigma_g^2$ , the selection coefficient can be calculated as

$$\begin{aligned} s(\alpha, t) &= \frac{w(\alpha + \bar{z}_B(t), t)}{w(\bar{z}_B(t), t)} - 1 \\ &\approx -\frac{\alpha^2}{2(\sigma_s^2 + \sigma_g^2)} + \frac{\alpha}{\sigma_s^2 + \sigma_g^2}(vt - \bar{z}_B(t)). \end{aligned} \quad (7)$$

254 Note that the genetic background variance has the effect of broadening the fitness landscape  
255 experienced by the focal allele (the term  $\sigma_s^2 + \sigma_g^2$ ).

Plugging equation (6a) into equation (7) then yields the selection coefficient,

$$s(\alpha, t) \approx -\frac{\alpha^2}{2(\sigma_s^2 + \sigma_g^2)} + \frac{\alpha v}{\gamma(\sigma_s^2 + \sigma_g^2)}(1 - (1 - \gamma)^t). \quad (8)$$

256 Assuming that the population is perfectly adapted at  $t = 0$  ( $\bar{z}_B = 0$ ), the initial (deleterious)  
257 selection coefficient is given by

$$s(\alpha, 0) = -\frac{\alpha^2}{2(\sigma_s^2 + \sigma_g^2)}.$$

258 Unlike in the model without genetic background variation (KOPP and HERMISSON 2009b),  
259  $s(\alpha, t)$  does not increase linearly, but instead depends on the evolution of the phenotypic lag  
260  $\delta$  between the optimum and the mean background phenotype. In particular, the population  
261 will reach a dynamic equilibrium with  $\Delta\bar{z}_B = v$ , where it follows the optimum with a constant  
262 lag

$$\delta_{\text{eq}} = \frac{v}{\gamma} \quad (9)$$

263 (BÜRGER and LYNCH 1995). Consequently, the selection coefficient for  $\alpha$  approaches

$$\lim_{t \rightarrow \infty} s(\alpha, t) = -\frac{\alpha^2}{2(\sigma_s^2 + \sigma_g^2)} + \frac{\alpha v}{\gamma(\sigma_s^2 + \sigma_g^2)}. \quad (10)$$

264 Note that the right-hand side can be written as  $s(\alpha, 0) + \alpha\beta_{\text{eq}}$ , where  $\beta_{\text{eq}}$  is the equilibrium  
265 selection gradient (KOPP and MATUSZEWSKI 2014). In this case, the largest obtainable  
266 selection coefficient is for  $\alpha = \delta_{\text{eq}}$  and evaluates to

$$s_{\text{max}} = s(\delta_{\text{eq}}, \infty) = \frac{v^2}{2\gamma^2(\sigma_s^2 + \sigma_g^2)}. \quad (11)$$

267 The range of allelic effects  $\alpha$  that can reach a positive selection coefficient is bounded by  
268  $\alpha_{\text{min}} = 0$  and  $\alpha_{\text{max}} = 2\delta_{\text{eq}}$ . Note that in previous adaptive-walk models (e.g., KOPP and  
269 HERMISSON 2009b; MATUSZEWSKI *et al.* 2014) there was no strict  $\alpha_{\text{max}}$ , since the popula-  
270 tion followed the optimum by stochastic jumps, whereas in the present model, the genetic  
271 background evolves deterministically and establishes a constant equilibrium lag.

272 Assuming that  $\alpha$  was deleterious prior to the environmental change, its allele frequency  
273 spectrum  $\rho(x, \alpha)$  is given by equation (A5). When genetic background variation is absent

274 the fixation probability  $\Pi_{\text{fix}}(\alpha)$  (eq. A7) can be calculated explicitly using

$$\varphi_{\sigma_g^2=0}(\alpha) = 1 + \frac{1}{2} \sqrt{\frac{\pi}{2\frac{\alpha v}{\sigma_s^2}}} \exp\left(\frac{s(\alpha, 0)^2}{2\frac{\alpha v}{\sigma_s^2}}\right) \operatorname{erfc}\left(\frac{s(\alpha, 0)}{\sqrt{2\frac{\alpha v}{\sigma_s^2}}}\right). \quad (12)$$

275 For the general case, however,  $\Pi_{\text{fix}}(\alpha)$  can only be calculated numerically using equation (8)

276 in equation (A7b), yielding

$$2\varphi(\alpha) = 1 + \int_0^\infty (1 + s(\alpha, t)) \exp\left[-\left(\left(-\frac{\alpha^2}{2(\sigma_s^2 + \sigma_g^2)}\right) + \left((1 - (1 - \gamma)^t) \frac{1}{\log[(1 - \gamma)^t]} + 1\right) \frac{\alpha v}{\gamma(\sigma_s^2 + \sigma_g^2)}\right) t\right] dt. \quad (13)$$

277 The fixation probability for an allele from the standing genetic variation with allelic effect  $\alpha$

278 and a recurrent (per locus) mutation rate  $\theta$  can then be calculated as

$$P_{\text{SGV}}(\alpha) = \begin{cases} 1 - C(\alpha) \int_0^1 x^{\theta-1} \exp[-4N_e |s(\alpha, 0)| x] \left(1 - \frac{1}{\varphi(\alpha)}\right)^{2N_e x} dx & \text{if } 0 < \alpha < \alpha_{max} \\ 0 & \text{otherwise,} \end{cases} \quad (14)$$

279 where  $C(\alpha) = \left(\frac{\gamma[\theta, 4N_e |s(\alpha, 0)|]}{(4N_e |s(\alpha, 0)|)^\theta}\right)^{-1}$ .

280 When checked against Wright-Fisher simulations (see Methods for details), our analytical

281 approximation equation (14) performs generally very well (Figs. 1 and S3\_1). The only

282 exception occurs when the background variation is high (large  $\sigma_g^2$ ) and stabilizing selection

283 is weak (i.e., if  $\sigma_s^2$  is large). In this case, equation (14) underestimates  $P_{\text{SGV}}(\alpha)$  for small

284  $\alpha \sim 0.5\sigma_m$ . The reason is that, under a constant optimum (i.e., before the environmental

285 change), the genetic background compensates for the deleterious effect of  $\alpha$  (i.e.,  $\bar{z}_B < 0$ ,

286 in violation of our assumption that  $\bar{z}_B(0) = 0$ ), effectively reducing the selection strength

287 against the deleterious mutant allele. Consequently,  $\alpha$  is, on average, present at higher

288 initial frequencies than predicted by equation (A5).

289 Note that, if  $\alpha$  is small compared to the genetic background variation (i.e., in the limit of



290  $\alpha/\sigma_m \rightarrow 0$ ) and environmental change is slow (i.e.,  $v \ll 10^{-5}$ ),  $P_{\text{SGV}}(\alpha)$  will approach the  
291 probability of fixation from standing genetic variation for a neutral allele (i.e.,  $\alpha = 0$ ), which  
292 can be calculated as

$$P_{\text{SGV, neutral}} = \int_0^1 x\rho(x)dx = \frac{H_\theta - 1}{\gamma + \psi(\theta)}. \quad (15)$$

293 where  $\rho(x)$  is given by equation (A3),  $H_n$  denotes the  $n^{\text{th}}$  harmonic number,  $\gamma \approx 0.577$  is  
294 Euler's gamma and  $\psi(\cdot)$  is the polygamma function (see dashed lines in Figs. 1 and S3\_1).

295 Figures 1 and S3\_1 show some general trends: First, the probability for a mutant allele to  
296 become fixed increases with the rate of environmental change,  $v$ , (irrespective of its effect  
297 size  $\alpha$ , the per locus mutation rate  $\theta$  and the width of the fitness landscape  $\sigma_s^2$ ) since only  
298 the positive term in equation (8) depends (linearly) on  $v$ . Second,  $P_{\text{SGV}}(\alpha)$  is proportional  
299 to  $\theta$  as long as  $\theta$  is small (compare  $\theta = 0.004$  and  $\theta = 0.04$  in Fig. S3\_1), simply because the  
300 probability that  $\alpha$  is present in the population is linear in  $\theta$ . Thus, Figure 1 is representative  
301 for the limit  $\theta \rightarrow 0$  which will be used below. Indeed, only if the per-locus mutation rate  
302 is fairly large ( $\theta > 0.1$ ), does the shape of the distribution of allele frequencies become  
303 important, and the increase in  $P_{\text{SGV}}(\alpha)$  with  $\theta$  becomes less than linear (Fig. S3\_1). Third,  
304 changes in the width of the fitness landscape,  $\sigma_s^2$ , have a dual effect: While increasing  $\sigma_s^2$   
305 promotes the initial frequency of the focal allele in the standing genetic variation (because  
306 stabilizing selection is weaker), the selection coefficient increases more slowly after the onset  
307 of environmental change (such that the allele is less likely to be picked up by selection;  
308 see eq. 7). Our results, however, show that the former effect always outweighs the latter  
309 (as  $P_{\text{SGV}}(\alpha)$  increases with  $\sigma_s^2$ ). Finally, if the genetic background variation  $\sigma_g^2$  is below  
310 a threshold value (e.g.,  $\sigma_g^2 < 0.005$ ; the exact threshold should depend on  $\theta$  and  $\sigma_s^2$ ) it  
311 only marginally affects the fixation probability of the focal allele  $\alpha$ . Once  $\sigma_g^2$  surpasses this  
312 value, however, it critically affects  $P_{\text{SGV}}(\alpha)$  (in accordance with the results by CHEVIN and

313 HOSPITAL 2008). In particular, as  $\sigma_g^2$  increases  $P_{\text{SGV}}(\alpha)$  decreases, because most large-effect  
314 alleles remain deleterious even if environmental change is fast. Thus, enlarged background  
315 variation acts as if reducing the rate of environmental change  $v$ . In summary, our analytical  
316 results are in good agreement with the WF-simulation model, and will serve as an important  
317 first step towards deriving the distribution of adaptive substitutions from standing genetic  
318 variation.

**Figure 1** – The probability for a mutant allele to adapt from standing genetic variation as a function of the rate of environmental change  $v$ . Solid lines correspond to the analytical prediction (eq. 14), the grey dashed line shows the probability for a neutral allele ( $\alpha = 0$ ; eq. 15), and symbols give results from Wright-Fisher simulations. The phenotypic effect size  $\alpha$  of the mutant allele ranges from  $0.5\sigma_m$  (top line; black) to  $3\sigma_m$  (bottom line; purple) with increments of  $0.5\sigma_m$ . The figures in each parameter box (per locus mutation rate  $\theta$ , width of fitness landscape  $\sigma_s^2$ ) correspond to different values of the genetic background variation  $\sigma_g^2$  with  $\sigma_g^2 = 0$  (no background variation; top left),  $\sigma_g^2 = 0.005$  (top right),  $\sigma_g^2 = 0.01$  (bottom left) and  $\sigma_g^2 = 0.05$  (bottom right). Other parameters:  $N_e = 25000$ ,  $\theta = 0.004$ ,  $\sigma_m^2 = 0.05$ .

319

320

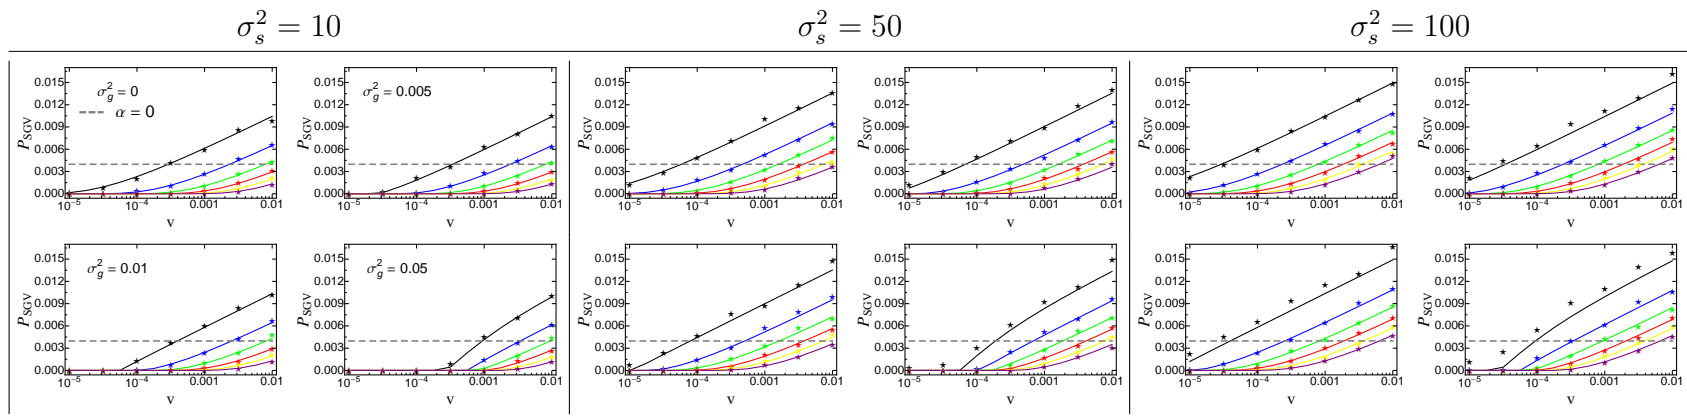

## 321 The distribution of adaptive substitutions from standing genetic variation

322 We now derive the distribution of adaptive substitutions from standing genetic variation  
323 over all mutant effects  $\alpha$ . In the previous section, we derived the fixation probability at  
324 a focal locus (with a given effect  $\alpha$ ) by treating the genetic background variance  $\sigma_g^2$  as an  
325 independent model parameter. In the full model, this variance results from a balance of  
326 mutation, selection and drift at all background loci. As such, it is a function of the basic  
327 model parameters for these forces. Since we use an infinite-sites model, there is no recurrent  
328 mutation and each allele originates from a single mutation. Consequently, the amount of  
329 background variation  $\sigma_g^2$  is accurately predicted by the Stochastic-House-of-Cards (SHC)  
330 approximation (not shown; BÜRGER and LYNCH 1995)

$$\sigma_g^2 = \frac{\Theta \sigma_m^2}{1 + \frac{N_e \sigma_m^2}{\sigma_s^2}}, \quad (16)$$

331 where mutation is parametrized by the total (per trait) mutation rate  $\Theta$  and the mutational  
332 variance  $\sigma_m^2$ , the width of the fitness landscape is given by  $\sigma_s^2$ , and the effective population  
333 size  $N_e$  is a measure for genetic drift.

334 To derive the probability that an allele with a given phenotypic effect  $\alpha$  contributes to  
335 adaptation, we first need to calculate the probability that such an allele segregates in the  
336 population at time 0. Following HERMISSE and PENNING (2005), the probability  $P_0$  that  
337 the allele is *not* present can be approximated by integrating over the distribution of allele  
338 frequencies  $\rho(x, \alpha)$  (eq. A5) from 0 to  $\frac{1}{2N_e}$  yielding

$$\begin{aligned} P_0(\alpha) &\approx \left( \frac{2N_e}{4N_e |s(\alpha, 0)| + 1} \right)^{-\theta} \\ &= \exp \left[ -\theta \log \left[ \frac{2N_e}{4N_e |s(\alpha, 0)| + 1} \right] \right] \end{aligned} \quad (17)$$

339 (eq. 7 and Appendix of HERMISSON and PENNINGS 2005). The fixation probability can then  
 340 be calculated by conditioning on segregation of the allele in the limit  $\theta \rightarrow 0$  (due to the  
 341 infinite-sites assumption). Using equation (14), this probability reads

$$\begin{aligned} \Pi_{\text{seg}}(\alpha) &= \lim_{\theta \rightarrow 0} \frac{P_{\text{SGV}}(\alpha)}{1 - P_0(\alpha)} \\ &\approx \lim_{\theta \rightarrow 0} \frac{1 - C(\alpha) \int_0^1 x^{\theta-1} \exp[-4N_e |s(\alpha, 0)|x] \left(1 - \frac{1}{\varphi(\alpha)}\right)^{2Nx} dx}{1 - \exp\left[-\theta \log\left[\frac{2N_e}{4N_e |s(\alpha, 0)| + 1}\right]\right]}, \end{aligned} \quad (18)$$

342 where  $C(\alpha) = \left(\frac{\gamma[\theta, 4N_e |s(\alpha, 0)|]}{(4N_e |s(\alpha, 0)|)^\theta}\right)^{-1}$  (see also eq. A5) and with  $\varphi(\alpha)$  according to equation (13).  
 343 The limit in equation (18) can be approximated numerically by setting  $\theta$  to a very small, but  
 344 positive value.

345 Multiplying by the rate of mutations with effect  $\alpha$  (i.e.,  $\Theta p(\alpha)$ ), the distribution of adaptive  
 346 substitutions from standing genetic variation is given by

$$\begin{aligned} p_{\text{SGV}}(\alpha) &\approx \frac{\Theta p(\alpha) \Pi_{\text{seg}}(\alpha)}{\int_0^{\alpha_{\text{max}}} \Theta p(\alpha) \Pi_{\text{seg}}(\alpha) d\alpha} \\ &= C_1(\alpha) p(\alpha) \Pi_{\text{seg}}(\alpha), \end{aligned} \quad (19)$$

347 where  $C_1(\alpha)$  is a normalization constant (black line in Figs. 2, 3 and Fig. 4). Note that  
 348 equation (19) still depends on  $\Theta$  through its effect on the background variance  $\sigma_g^2$  (which  
 349 affects  $\Pi_{\text{seg}}(\alpha)$ ). In particular, in the SHC approximation (eq. 16),  $\sigma_g^2$  scales linearly with  $\Theta$ .  
 350 Furthermore, equation (19) should be valid for any distribution of mutational effects  $p(\alpha)$ .

351 In the limit where the equilibrium lag is reached fast (i.e., when  $\gamma$  is large; eq. 6b), the  
 352 moving-optimum model reduces to a model with constant selection for any focal allele (i.e., as  
 353 in HERMISSON and PENNINGS 2005). Using equations (A6) and (17) the fixation probability

354 for a segregating allele can be calculated as

$$\Pi_{\text{seg,SGV},\delta_{\text{eq}}}(\alpha) \approx \lim_{\theta \rightarrow 0} \frac{1 - \exp \left[ -\theta \log \left[ 1 + \frac{4N_e s(\alpha, \infty)}{4N_e |s(\alpha, 0)| + 1} \right] \right]}{1 - P_0(\alpha)}. \quad (20)$$

355 Plugging equation (20) into equation (19), the distribution of adaptive substitutions from  
 356 standing genetic variation can be approximated by

$$p_{\text{SGV},\delta_{\text{eq}}}(\alpha) \approx C_2(\alpha)p(\alpha)\Pi_{\text{seg,SGV},\delta_{\text{eq}}}(\alpha), \quad (21)$$

357 where  $C_2(\alpha)$  is a normalization constant (red line in Figs. 2, 3).

358 Similarly, the fixation probability of *de-novo* mutations under the equilibrium lag  $\delta_{\text{eq}}$  can be  
 359 derived (using 11 and eq. A2 with an initial frequency of  $1/(2N)$ ) as

$$\Pi_{\text{fix,DNM},\delta_{\text{eq}}}(\alpha) = \left( 1 - \exp \left[ -\frac{\alpha(2\delta_{\text{eq}} - \alpha)}{\sigma_s^2 + \sigma_g^2} \right] \right), \quad (22)$$

360 yielding the distribution of adaptive substitutions

$$p_{\text{DNM},\delta_{\text{eq}}}(\alpha) \approx p(\alpha)C_3(\alpha)\Pi_{\text{fix,DNM},\delta_{\text{eq}}}(\alpha), \quad (23)$$

361 where  $C_3(\alpha)$  is a normalization constant (grey curve in Figs. 2, 3).

362 In contrast, if the environment changes very slowly, we can calculate the limit distribution of  
 363 adaptive substitutions from standing genetic variation by approximating the fixation proba-  
 364 bility by that of a neutral allele (i.e., its allele frequency  $x$ ). In this case,

$$\Pi_{\text{seg},v \rightarrow 0}(\alpha) \approx \lim_{\theta \rightarrow 0} \frac{\mathcal{F}(\alpha)}{1 - P_0(\alpha)} \quad (24a)$$

365 with

$$\mathcal{F}(\alpha) = \int_0^1 \rho(x, \alpha) x dx = \frac{{}_1F(0, \theta + 1, 4N_e |s(\alpha, 0)|)_1}{{}_1F(0, \theta, 4N_e |s(\alpha, 0)|)_1}, \quad (24b)$$

366 where  $\rho(x, \alpha)$  is given by equation (A4) and the right-hand side is a ratio of hypergeometric  
367 functions.

368 Using equation (24a) the distribution of substitutions from standing genetic variation reads

$$p_{\text{SGV}, v \rightarrow 0}(\alpha) \approx C_4(\alpha) p(\alpha) \Pi_{\text{seg}, v \rightarrow 0}(\alpha), \quad (25)$$

369 where  $C_4(\alpha)$  again denotes a normalization constant (blue line in Figs. 3, S3\_2).

370 **The accuracy of the approximation** When compared to individual-based simulations,  
371 our analytical approximation for the distribution of adaptive substitutions from standing  
372 genetic variation (eq. 19) performs, in general, very well as long as selection is strong, that is,  
373 the rate of environmental change  $v$  is high and/or the width of the fitness landscape  $\sigma_s^2$  is not  
374 too large (Fig. 2). Under weak selection, however, equation (19) fails to capture the fixation  
375 of alleles with neutral or negative effects (“backward fixations”;  $\alpha \leq 0$ ). The reason is that  
376 equation (A7) only considers the fixation of alleles whose selection coefficient  $s(\alpha, t)$  becomes  
377 positive in the long term. But if the rate of environmental change is slow (or  $\sigma_s^2$  is very  
378 large), most alleles get fixed or lost simply by chance, that is, genetic drift. In particular, if  
379 genetic drift is the main driver of phenotypic evolution (i.e.,  $N_e |s(\alpha, t)| < 1$ ), the distribution  
380 of adaptive substitutions is almost symmetric around 0 (see Fig. S3\_2). This distribution  
381 is described very well by equation (25), which assumes that the fixation probability of an  
382 allele is proportional to its initial frequency in the standing variation. In addition, even  
383 for cases where environmental change imposes modest directional selection, equation (25)  
384 still captures the shape of the distribution of adaptive substitutions reasonably well, when  
385 centered around the empirical mean (blue line in Figs. 2, 3).

**Figure 2** – The distribution of adaptive substitutions from standing genetic variation. Histograms show results from individual-based simulations. The black line corresponds to the analytical prediction (eq. 19), with the genetic background variation  $\sigma_g^2$  determined by the SHC approximation (eq. 16). The red line gives the analytical prediction for the limiting case where the equilibrium lag  $\delta_{eq}$  is reached fast (eq. 21). The blue line is based on the analytical prediction eq. (25) – which assumes a neutral fixation probability – but has been shifted so that it is centered around the empirical mean. The grey curve gives the analytical prediction for substitutions from *de-novo* mutations under the assumption that the phenotypic lag  $\delta_{eq}$  has reached its equilibrium (eq. 23). The asterisks indicate where  $N_e s_{max} \geq 10$ . Fixed parameter:  $\sigma_m^2 = 0.05$ .

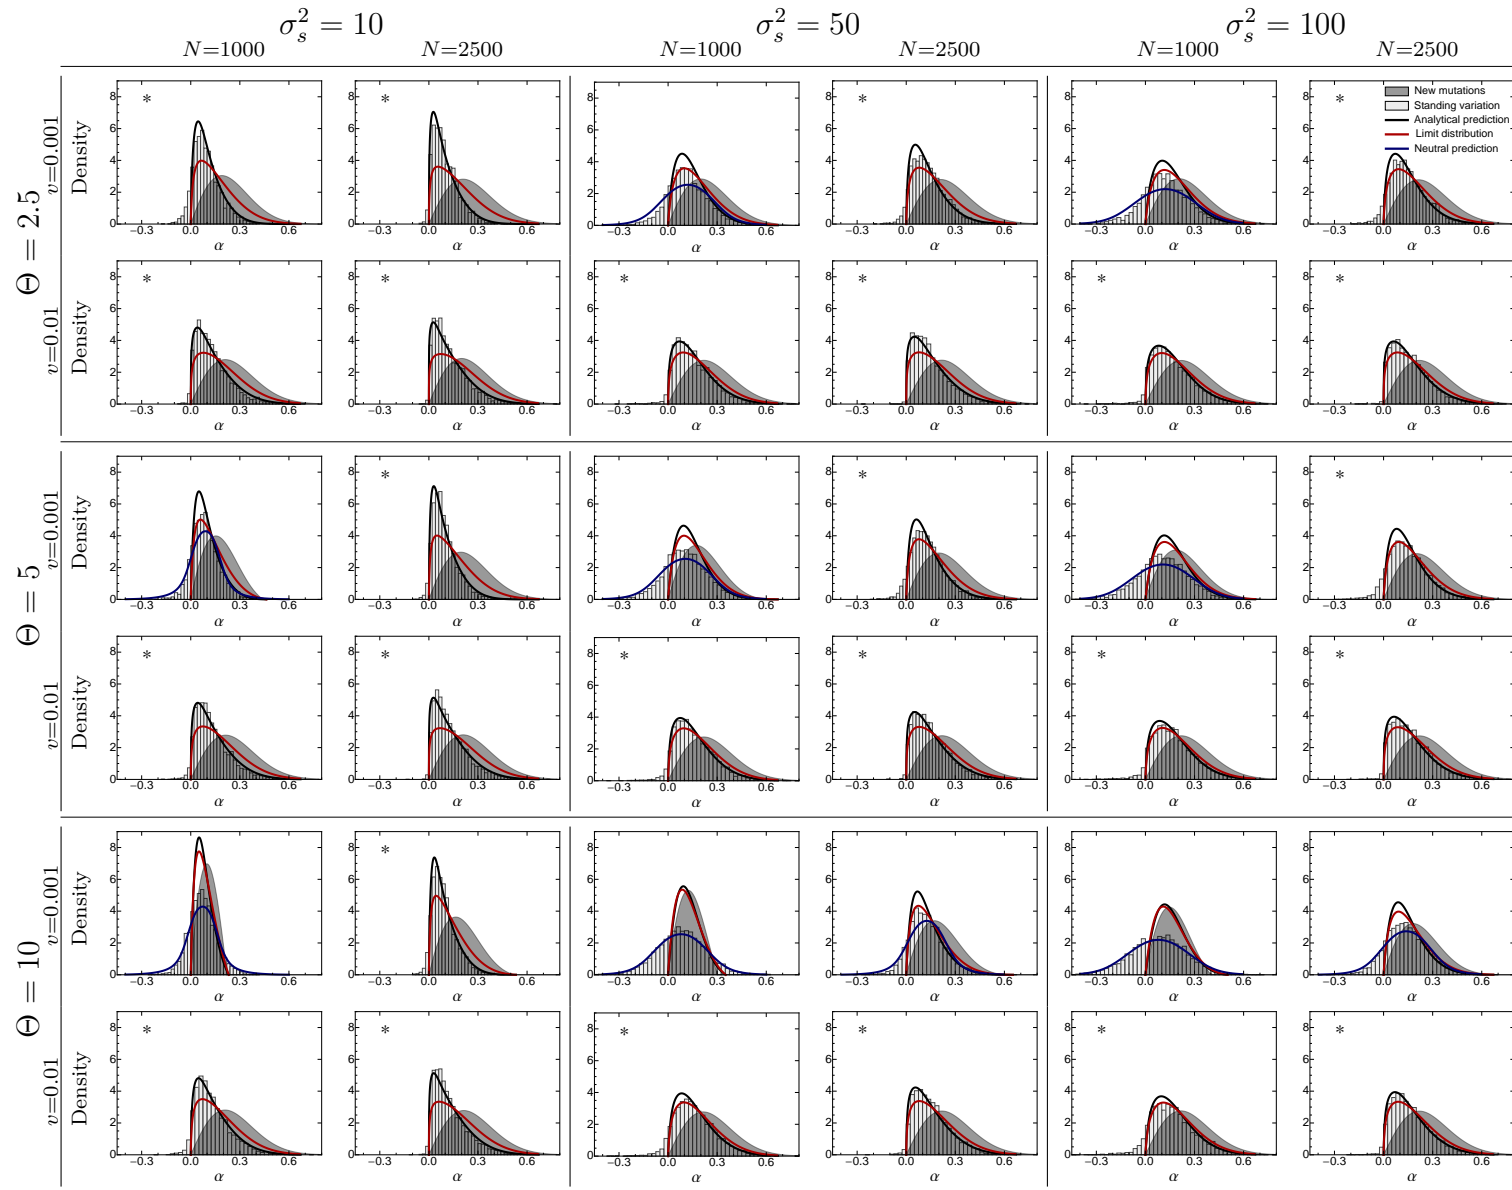

396

397



**Figure 3** – The distribution of adaptive substitutions from standing genetic variation for various rates of environmental change. For further details see Fig. 2. Fixed parameters:  $\Theta = 2.5$ ,  $N = 2500$ ,  $\sigma_m^2 = 0.05$ .

398

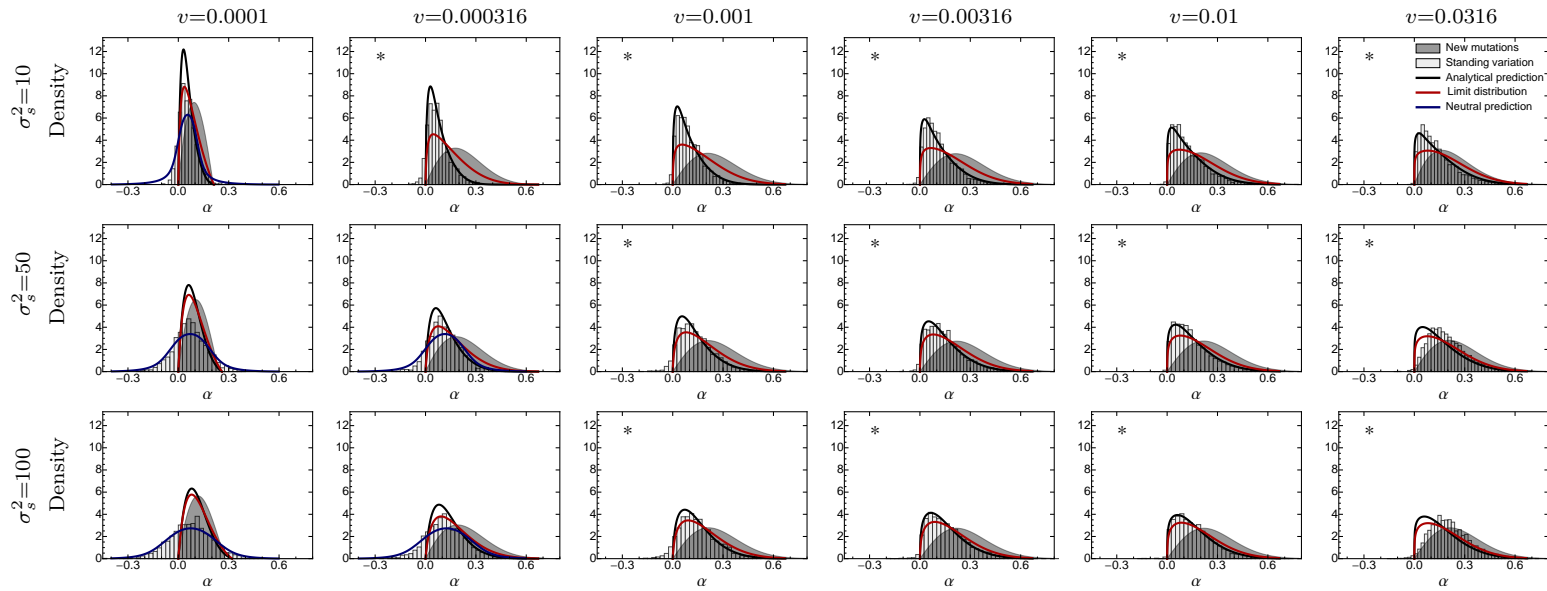

399

386 With a moving phenotypic optimum, the selection coefficient (eq. 8) is initially very small.  
387 Accordingly, there is always a phase during the adaptive process where genetic drift domi-  
388 nates, that is, where  $N_e|s(\alpha, t)| < 1$  for all mutant alleles. The length of this phase (i.e., the  
389 time it takes until selection becomes the main force of evolution) depends on the interplay of  
390 multiple parameters, notably  $v$ ,  $\sigma_s^2$ ,  $N_e$  and  $\Theta$ . A good heuristic to determine whether evo-  
391 lution will ultimately become dominated by selection is to calculate  $N_e s_{\max}$  (eq. 11), which  
392 gives the maximal population-scaled selection coefficient. Since the selection coefficient of  
393 most mutations will be smaller than this value, one can consider as a rule of thumb that  
394 selection is the main driver of evolution as long as  $N_e s_{\max} \geq 10$ . In this case, equation (19)  
395 matches the individual-based simulations very well (see asterisks in Figs. 2, 3). In summary,  
400 the accuracy of our approximation crucially depends on the efficacy of selection.

401 The effects of linkage on the distribution of adaptive substitutions from standing genetic  
402 variation are discussed in Supporting Information 1. The main result is that only tight  
403 linkage has a noticeable effect, namely to reduce the efficacy of selection and increase the  
404 proportion of “backward” fixations (moving the distribution closer to the prediction from  
405 eq. 25).

406 **Biological interpretation** As shown in Figures (2) and (3), adaptive substitutions from  
407 standing genetic variation have, on average, smaller phenotypic effects than those from *de-*  
408 *novo* mutations. There are two reasons for this result. First, in the standing genetic variation,  
409 small-effect alleles are more frequent than large-effect alleles and might already segregate  
410 at appreciable frequency (increasing their fixation probability). Second, substitutions from  
411 standing variation occur in the initial phase of the adaptive process, where the phenotypic  
412 lag is small, whereas our approximation for *de-novo* mutations (eq. 23) assumes that the phe-  
413 notypic lag has reached its maximal (equilibrium) value (which need not be large, depending  
414 on the amount of genetic background variation). The relative importance of these two effects  
415 can be seen in Figures (2) and (3): Comparing the grey shaded area (eq. 23; *de-novo* muta-

416 tions under the equilibrium lag) with the red line (eq. 21; standing genetic variation under  
417 the equilibrium lag) shows the effect of larger starting frequencies of small-effect mutations  
418 from the standing genetic variation. The difference of the black (eq. 19; standing genetic  
419 variation) and red (eq. 21; standing genetic variation under the equilibrium lag) lines show  
420 the effects of the initially smaller lag (i.e., the effect of the dynamical selection coefficient).  
421 Note that the first effect is always important (even if  $\Theta$  and  $\sigma_s^2$  are large and  $v$  is small, where  
422 the red line and the grey curve almost coincide—though this is only because the approxima-  
423 tion is bad). The second effect, however, becomes particularly important if  $\gamma = \sigma_g^2 / (\sigma_g^2 + \sigma_s^2)$   
424 is small (i.e, if the time to reach the equilibrium lag is large), such that selection coefficients  
425 are dynamic and small-effect alleles are selected earlier than large-effect alleles, explaining  
426 the relative lack of large-effect alleles in the distribution of adaptive substitutions.

427 Generally, the distribution of adaptive substitutions is unimodal and generally resembles a  
428 log-normal distribution (Figs. 2, 3). Only if selection is very weak (i.e., when  $\sigma_s^2$  is large  
429 and/or  $v$  is small), does it contain a significant proportion of “backward fixations” (with  
430 negative  $\alpha$ ; Fig. 3; see “Accuracy of the Approximation” ). As the rate of environmental  
431 change  $v$  increases, the mean phenotypic effect of substitutions increases (Fig. 4, top row),  
432 too, but the mode may actually decrease (Fig. 3), that is, the distribution becomes more  
433 asymmetric and skewed, resembling the “almost exponential” distribution of substitutions  
434 from *de-novo* mutations in the sudden change scenario (ORR 1998). A likely explanation  
435 is that small-effect alleles, which are common in the standing variation, are under stronger  
436 selection and have an increased fixation probability if  $v$  is large (see Fig. 1).

437 Interestingly, if the environment changes very fast the simulated distribution of adaptive  
438 substitutions from standing genetic variation almost exactly matches the one predicted by  
439 equation (23) for *de-novo* mutations (Fig. 5, see also Figs. 2, 3). However, this seems to be an  
440 artefact rather than a relevant biological phenomenon. The reason is that the environment  
441 changes so fast that the population quickly dies out. Thus, the resulting distribution of  
442 adaptive substitutions is that for a dying population and might not necessarily reflect the

443 adaptive process. In an experimental setup, though, where populations evolve until they  
 444 go extinct, the distribution of adaptive substitutions from standing genetic variation might  
 445 truly be indistinguishable from that from *de-novo* mutations.

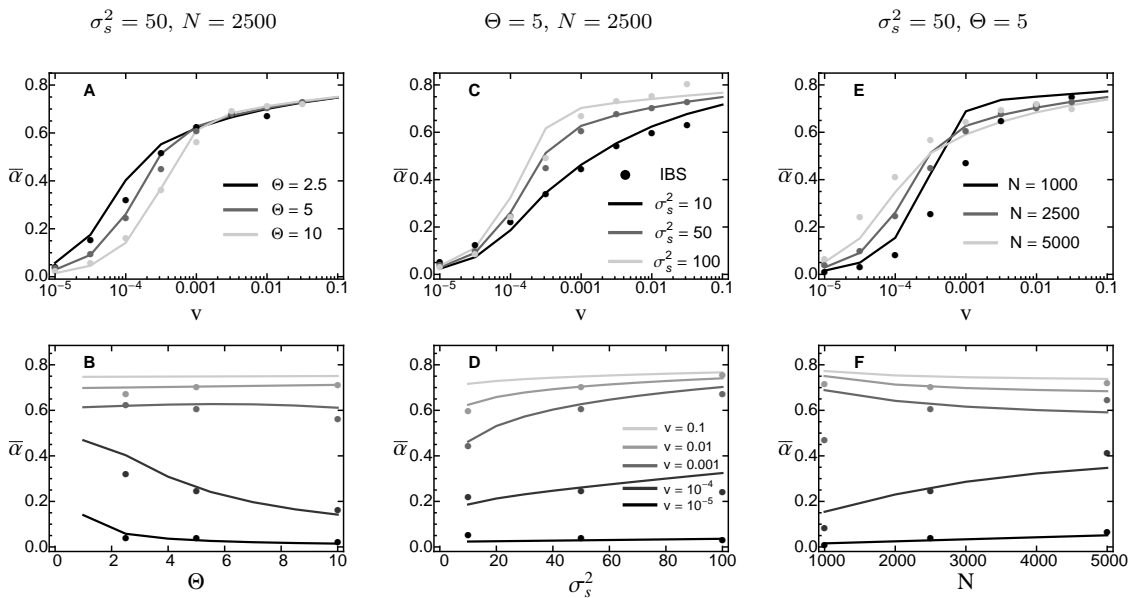

**Figure 4** – The mean size of adaptive substitutions from standing genetic variation, measured in units of mutational standard deviations ( $\sigma_m$ ) as a function of the rate of environmental change  $v$  (top row) and for various  $v$  as a function of the population-wide mutation rate  $\Theta$  (bottom left), the width of the fitness landscape  $\sigma_s^2$  (bottom middle) and the population size  $N$  (bottom right). Lines show the analytical prediction (the mean of the distribution eq. eq:pDistMoveOpt), and symbols give results from individual-based simulations. Error bars for standard errors are contained within the symbols. For  $v = 0.1$ , no simulation results are shown, as these constitute a degenerate case (for details see “The accuracy of the approximation”). Fixed parameter:  $\sigma_m^2 = 0.05$ .

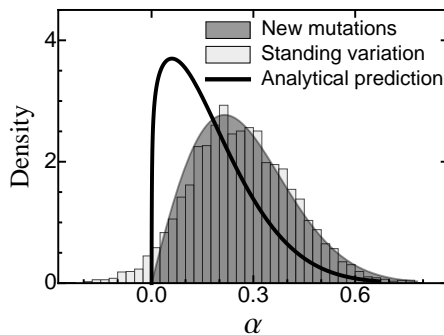

**Figure 5** – The distribution of adaptive substitutions from standing genetic variation in the case of fast environmental change. For further details see Fig. 2. Fixed parameters:  $\sigma_s^2 = 100, \Theta = 10, N = 2500, v = 0.1, \sigma_m^2 = 0.05$ .

446  
 447  
 448 In the following, we discuss the influence of the other model parameters ( $\Theta, \sigma_s^2$  and  $N$ ) on  
 449 the distribution of adaptive substitutions from standing genetic variation, and in particular,

450 its mean  $\bar{\alpha}$  (Fig. 4).

451 The effect of the rate of mutational supply  $\Theta$  depends strongly on the rate of environmental  
452 change  $v$ :  $\bar{\alpha}$  decreases with  $\Theta$  if  $v$  is small but is independent of  $\Theta$  if  $v$  is large (Fig. 4B).  
453 Recall that  $\Theta$  enters  $p_{\text{SGV}}(\alpha)$  (eq. 19) only indirectly through the background variance  $\sigma_g^2$ .  
454 Accordingly, as  $\Theta$  increases, so does  $\sigma_g^2$  and, thus,  $\gamma$  (eq. 6b). In the limit  $t \rightarrow \infty$ , the  
455 population will follow the optimum at a constant lag  $\delta_{eq} = \frac{v}{\gamma}$ . Thus, if  $v$  is large (such that,  
456 even for large  $\sigma_g^2$ , the lag is large relative to the mutational standard deviation  $\sigma_m$ ) increasing  
457  $\Theta$  does not affect  $\bar{\alpha}$ . In contrast, if  $v$  is small, increasing  $\Theta$  (and, hence,  $\sigma_g^2$ ) will reduce the  
458 lag even further, such that most large-effect alleles will be deleterious. Consequently, for  
459 small  $v$ ,  $\bar{\alpha}$  decreases as  $\Theta$  increases.

460 The width of the fitness landscape  $\sigma_s^2$  affects different aspects of the adaptive process, but its  
461 net effect is an increase of the mean effect size of fixed alleles as  $\sigma_s^2$  increases (i.e., as stabilizing  
462 selection gets weaker), especially if the rate of environmental change is intermediate (Fig. 4D).  
463 The reason is that weak stabilizing selection increases the frequency of large-effect alleles in  
464 the standing variation. In addition, weak selection also increases the phenotypic lag (eq. 9;  
465 see also KOPP and MATUSZEWSKI 2014), again favoring large effect alleles. Note that the  
466 latter point holds true even though weak selection increases the background variance  $\sigma_g^2$ .  
467 Finally, the effect of  $\sigma_s^2$  is strongest for intermediate  $v$ , because for small  $v$ , large-effect alleles  
468 are never favored, whereas for large  $v$ , all alleles with positive effect have a high fixation  
469 probability.

470 Similar arguments hold for  $N_e$  (when the rate of mutational supply,  $\Theta$ , is held constant).  
471 First, increasing  $N_e$  will always increase the efficacy of selection, resulting in lower initial  
472 frequencies of mutant alleles (eq. A4) and decreased  $\sigma_g^2$  (eq. 16). If the environment changes  
473 slowly,  $\bar{\alpha}$  increases with  $N_e$ , because the equilibrium lag increases (caused by the decrease  
474 in  $\sigma_g^2$ ). In contrast, if the rate of environmental change is fast,  $\bar{\alpha}$  slightly decreases with  $N_e$   
475 due to the lower starting frequency of large-effect alleles and because small-effect alleles are

476 selected more efficiently (i.e., they are less prone to get lost by genetic drift; Fig. 4F).

477 **The potential for adaptation from standing genetic variation and the rate of**  
478 **environmental change**

479 So far, we have focussed on the distribution of adaptive substitutions for individual fixation  
480 events. We now address what can be said about the total progress that can be made from  
481 standing genetic variation following a moving phenotypic optimum. The overall potential for  
482 adaptation from standing genetic variation depends on the mean number of alleles segregating  
483 in the standing genetic variation, which can be accurately approximated as (FOLEY 1992)

$$|\mathcal{G}| = 1 + \Theta \log \left[ \frac{2\sigma_s^2}{\sigma_m^2} \right] \quad (26)$$

484 (results not shown). The mean number of alleles that become fixed can then be calculated

485 as

$$|\mathcal{G}|_{\text{fix}} = |\mathcal{G}| \int_0^{\alpha_{\text{max}}} p(\alpha) \Pi_{\text{seg}}(\alpha) d\alpha, \quad (27)$$

486 where the integral equals the normalization constant in equation (19) (i.e., the proportion of  
487 fixed alleles). Finally, using equation (27), the average distance travelled in phenotype space  
488 before standing variation is exhausted is given by

$$z^* = 2|\mathcal{G}|_{\text{fix}} \bar{\alpha} = 2|\mathcal{G}| \int_0^{\alpha_{\text{max}}} \alpha p(\alpha) \Pi_{\text{seg}}(\alpha) d\alpha, \quad (28)$$

489 where  $\bar{\alpha}$  is the mean phenotypic effect size of adaptive substitutions from standing genetic  
490 variation, and the factor 2 in equation (28) comes from the fact that we are considering  
491 diploids (and  $\alpha$  denotes the phenotypic effect per haplotype). Note that, once the shift of  
492 the optimum considerably exceeds  $z^*$ , the population will inevitably go extinct without the  
493 input of new mutations.

494 Figure 6 (see also Figs. S3\_3, S3\_4, S3\_5 and Figs. S3\_6, S3\_7) illustrate these predictions  
495 and compare them to results from individual-base simulations (where, unlike in the rest of  
496 this paper, new mutational input was turned off after the onset of the environmental change).  
497 Both the mean number of fixations  $|\mathcal{G}|_{\text{fix}}$  and the mean phenotypic distance travelled  $z^*$   
498 increase with the rate of environmental change, reflecting the fact that more and larger-effect  
499 alleles become fixed if the environment changes fast. Only for very large  $v$ , where the rate  
500 of environmental change exceeds the “maximal sustainable rate of environmental change”  
501 (BÜRGER and LYNCH 1995), which for our choice for the number of offspring  $B = 2$  equals

$$v_{\text{crit}} = \sigma_g^2 \sqrt{\frac{2 \log \left[ 2 \sqrt{\frac{\sigma_s^2}{\sigma_g^2 + \sigma_s^2}} \right]}{\sigma_g^2 + \sigma_s^2}}, \quad (29)$$

502 do  $|\mathcal{G}|_{\text{fix}}$  and  $z^*$  decrease sharply, because the population goes extinct before fixations can be  
503 completed (grey-dashed line in Figs. 6, S3\_6 and S3\_7). At small values of  $v$ ,  $|\mathcal{G}|_{\text{fix}}$  matches  
504 the “neutral” prediction (grey-dashed line in Figs. S3\_3, S3\_4 and S3\_5). Note that these  
505 fixations have almost no effect on  $z^*$ , because their average effect is zero. At intermediate  
506  $v$ , equation (28) slightly underestimates  $z^*$  for parameter values leading to large background  
507 variance  $\sigma_g^2$  (i.e., high  $\Theta$  and  $\sigma_s^2$ ). The likely reason is that the analytical approximation  
508 assumes  $\sigma_g^2$  to be constant, while it obviously decreases in the simulations (since there are  
509 no *de-novo* mutations). All these results are qualitatively consistent across different values  
510 of  $\sigma_s^2$  and  $\Theta$  (Figs. 6, S3\_6, S3\_7).

**Figure 6** – The average distance traversed in phenotype space,  $z^*$ , as a function of the rate of environmental change  $v$ , when standing genetic variation is the sole source for adaptation. Symbols show results from individual-based simulations (averaged over 100 replicate runs). The black line gives the analytical prediction (eq. 28), with  $\sigma_g^2$  taken from equation (16). The grey-dashed line gives the critical rate of environmental change (eq. 29). Error bars for standard errors are contained within the symbols. Fixed parameters:  $N = 2500$ ,  $\sigma_m^2 = 0.05$ .

511

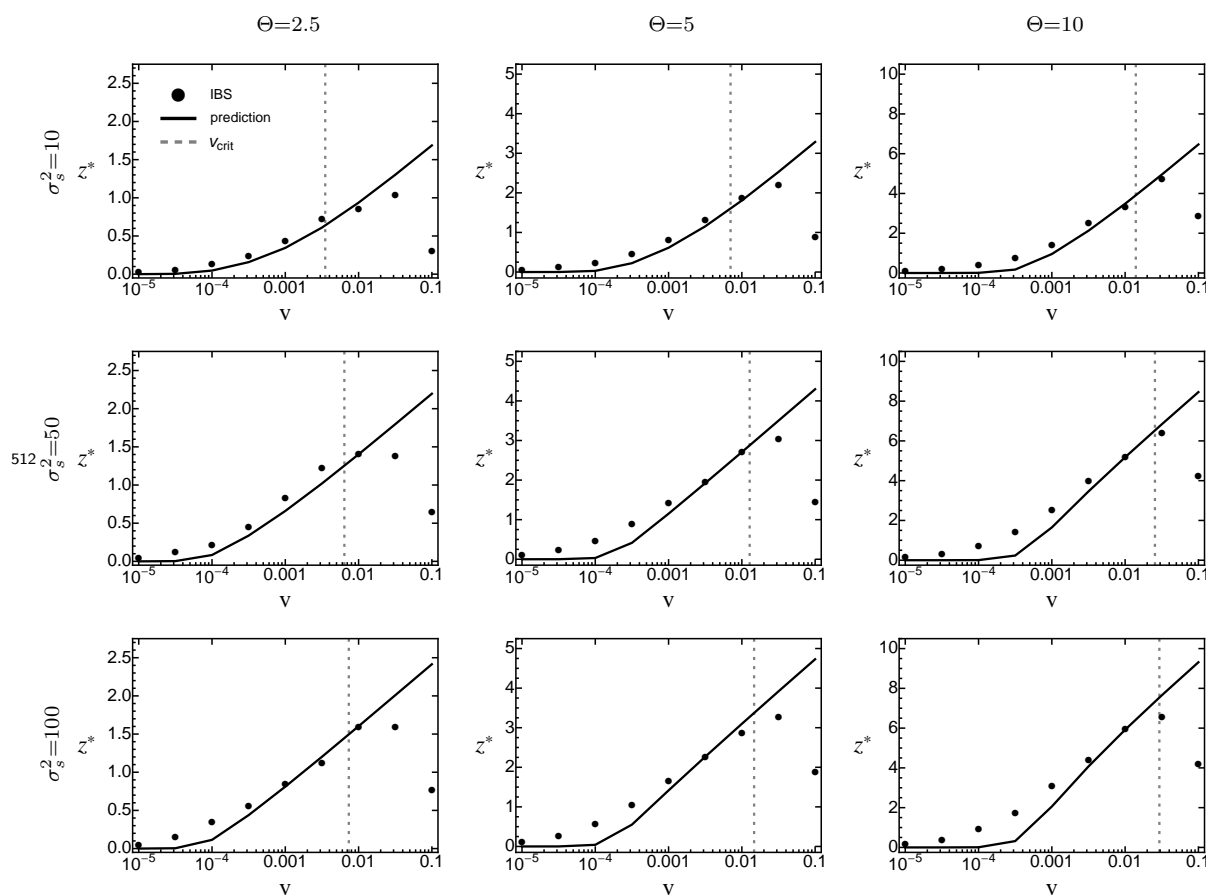

513 **The relative importance of standing genetic variation and *de-novo* mutations**  
 514 **over the course of adaptation**

515 Until now we have compared adaptation from standing genetic variation to that from *de-*  
 516 *novo* mutations in terms of their distribution of fixed phenotypic effects. We now turn to  
 517 investigating their relative importance over the course of adaptation. For this purpose, we  
 518 recorded (in individual-based simulations) the contributions of both sources of variation to  
 519 the phenotypic mean and variance. An average time series for both measures is shown in  
 520 Figure 7. As expected, the initial response to selection is almost entirely based on standing  
 521 variation, but the contribution of *de-novo* mutations increases over time. As a quantitative



522 measure for this transition, we define  $t_{\text{DNM},50}(\bar{z})$  as the point in time where the cumulative  
523 contribution of *de-novo* mutations has reached 50%. Indeed, we find that, beyond this time,  
524 adaptation almost exclusively proceeds by the fixation of *de-novo* mutations (Fig. 7A). As  
525 expected,  $t_{\text{DNM},50}(\bar{z})$  decreases with  $v$  (Figs. 8, S3\_8, first row), while the total phenotypic  
526 response  $\bar{z}$  increases (Figs. 8, S3\_8, second row). The reason is that faster environmental  
527 change induces stronger directional selection and increases the phenotypic lag, such that  
528 standing variation is depleted more quickly and *de-novo* mutations and contribute earlier.  
529 Note that, as in Figure 6, the total phenotypic response at time  $t_{\text{DNM},50}(\bar{z})$  decreases once  
530  $v$  exceeds the “maximal sustainable rate of environmental change”, for the same reasons as  
531 discussed above. Furthermore,  $t_{\text{DNM},50}(\bar{z})$  increases with both  $\Theta$  and  $\sigma_s^2$  (due to the increased  
532 standing variation; see eq. 16). Interestingly, the relative contribution of original standing  
533 genetic variation to the total genetic variance at time  $t_{\text{DNM},50}(\bar{z})$  remains largely constant (at  
534 around 20%) over large range of  $v$  and does not show any dependence on  $\Theta$  nor  $\sigma_s^2$  (Figs. 8,  
535 S3\_8; third row). Deviations occur only if  $v$  is either very small or very large. In particular,  
536 if  $v$  is small, standing variation is almost completely depleted before new mutations play  
537 a significant role. Conversely, if  $v$  is very large, standing genetic variation still forms the  
538 majority of the total genetic variance. As mentioned above, this is most likely because the  
539 population goes extinct before fixations can be completed, that is, before the entire (standing)  
540 adaptive potential is exhausted. All these results remain qualitatively unchanged if, instead  
541 of  $t_{\text{DNM},50}(\bar{z})$ , we define  $t_{\text{DNM},50}(\sigma_g^2)$  as the point in time where 50% of the current genetic  
542 variance goes back to *de-novo* mutations (Figs. S3\_9, S3\_10).

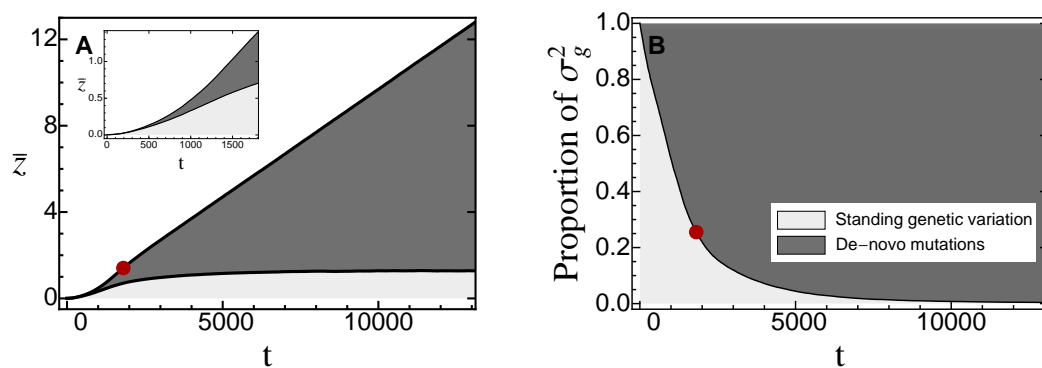

**Figure 7** – The contributions of standing genetic variation (light grey) and *de-novo* mutations (dark grey) to the cumulative phenotypic response to selection  $\bar{z}$  (A) and the *current* genetic variance (B) over time. Plots show average trajectories over 1000 replicate simulations. The red dot marks the point in time where 50% of the total phenotypic response were due to *de-novo* mutations. The inset in (A) shows a more detailed plot of the dynamics of  $\bar{z}$  up to this point. Fixed parameters:  $\sigma_s^2 = 50$ ,  $\Theta = 5$ ,  $N = 2500$ ,  $v = 0.001$ ,  $\sigma_m^2 = 0.05$ .

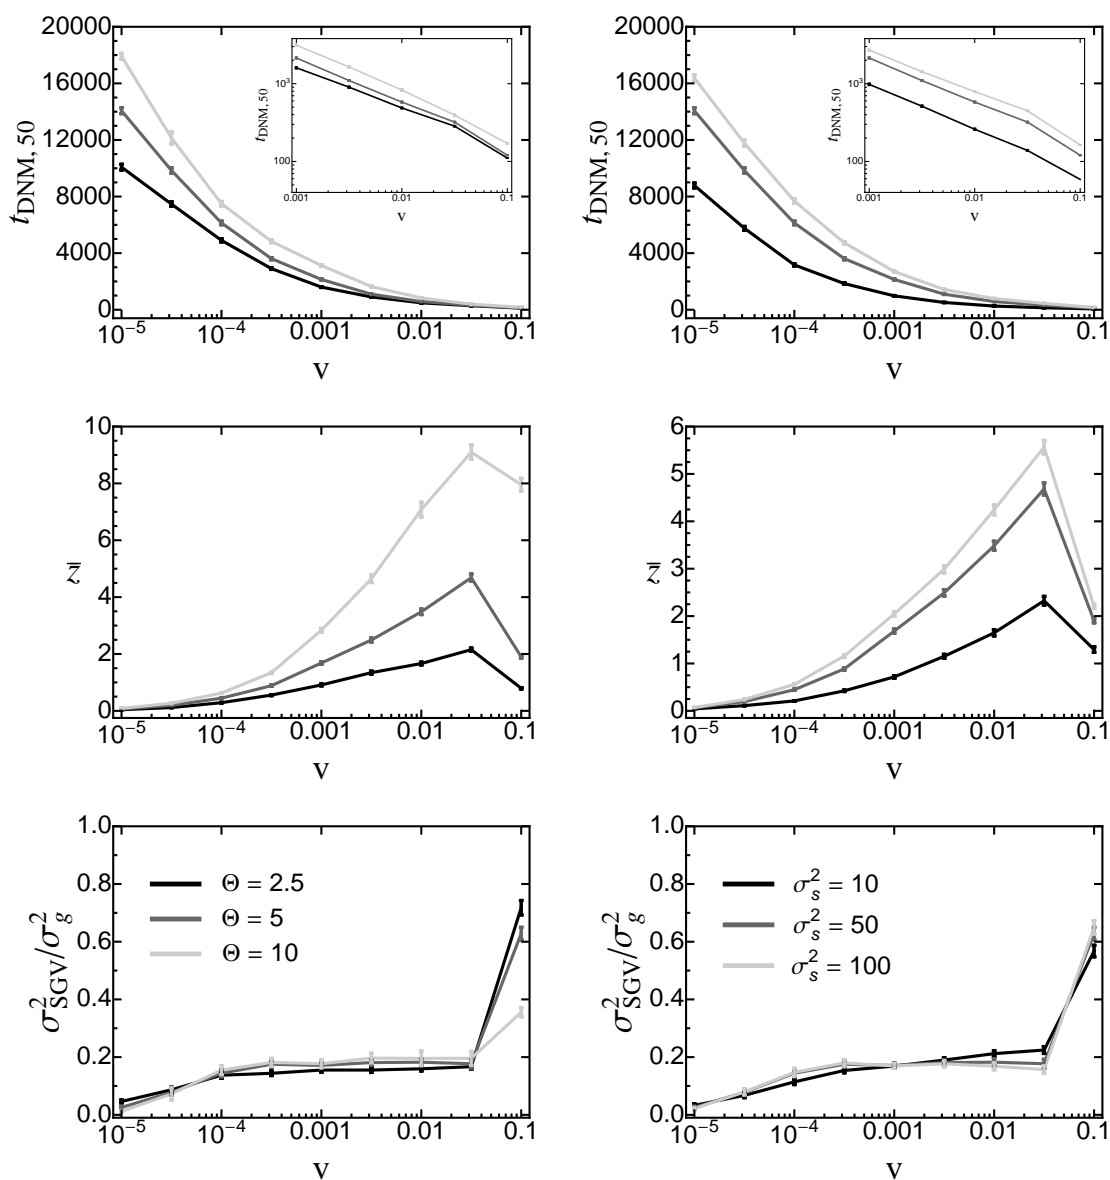

**Figure 8** – First row: the point in time  $t_{\text{DNM},50}(\bar{z})$  where 50% of the phenotypic response to moving-optimum selection have been contributed by *de-novo* mutations as a function of the rate of environmental change for various values of  $\Theta$  (left) and  $\sigma_s^2$  (right). Insets show the results for large  $v$  on a log-scale. Second row: The mean total phenotypic response at this time. Third row: The relative contribution of original standing genetic variation to the total genetic variance at time  $t_{\text{DNM},50}(\bar{z})$ . Data are means (and standard deviations) from 1000 replicate simulation runs. Fixed parameters (if not stated otherwise):  $\sigma_s^2 = 50$ ,  $\Theta = 5$ ,  $N = 2500$ ,  $\sigma_m^2 = 0.05$ .

## DISCUSSION

543 Global climate change has forced many populations to either go extinct or adapt to the  
544 altered environmental condition. When studying the genetic basis of this process, most the-  
545 oretical work has focused on adaptation from new mutations (e.g., GILLESPIE 1984; ORR  
546 1998, 2000; COLLINS *et al.* 2007; KOPP and HERMISSESON 2007, 2009a,b; MATUSZEWSKI *et al.*  
547 2014). Consequently, very little is known about the details of adaptation from standing ge-  
548 netic variation (but see ORR and BETANCOURT 2001; HERMISSESON and PENNINGS 2005),  
549 that is, which of the alleles segregating in a population will become fixed and contribute  
550 to the evolutionary response. Here, we have used analytical approximations and stochastic  
551 simulations to study the effects of standing genetic variation on the genetic basis of adap-  
552 tation in gradually changing environments. Supporting a verbal hypothesis by BARRETT  
553 and SCHLUTER (2008), we show that, when comparing adaptation from standing genetic  
554 variation to that from *de-novo* mutations, the former proceeds, on average, by the fixation of  
555 more alleles of small effect. In both cases, however, the genetic basis of adaptation crucially  
556 depends on the efficacy of selection, which in turn is determined by the population size,  
557 the strength of (stabilizing) selection and the rate of environmental change. When standing  
558 genetic variation is the sole source for adaptation, we find that fast environmental change en-  
559 ables the population to traverse larger distances in phenotype space than slow environmental  
560 change, in contrast to studies that consider adaptation from new mutations only (PERRON  
561 *et al.* 2008; BELL and GONZALEZ 2011; LINDSEY *et al.* 2013; BELL 2013). We now discuss  
562 these results in greater detail.

### 563 **The genetic basis of adaptation in the moving-optimum model**

564 Introduced as a model for sustained environmental change, such as global warming (LYNCH  
565 *et al.* 1991; LYNCH and LANDE 1993), the moving-optimum model describes the evolution of  
566 a quantitative trait under stabilizing selection towards a time-dependent optimum (BÜRGER  
567 2000). A large number of studies have analyzed both the basic model and several modifi-

568 cations, for example, models with a periodic or fluctuating optimum, or models for multi-  
569 ple traits (SLATKIN and LANDE 1976; CHARLESWORTH 1993; BÜRGER and LYNCH 1995;  
570 LANDE and SHANNON 1996; KOPP and HERMISSON 2007, 2009a,b; GOMULKIEWICZ and  
571 HOULE 2009; ZHANG 2012; CHEVIN 2013; MATUSZEWSKI *et al.* 2014). Following traditional  
572 quantitative-genetic approaches, the majority of these studies assumed that the distribution  
573 of genotypes (and phenotypes) is Gaussian with constant (time-invariant) genetic variance,  
574 and they have mostly focussed on the evolution of the population mean phenotype and on  
575 the conditions for population persistence (BÜRGER and LYNCH 1995; LANDE and SHANNON  
576 1996; GOMULKIEWICZ and HOULE 2009). None of these models, however, allows to address  
577 the fate of individual alleles (i.e., whether they become fixed or not). In a recent series of  
578 papers on the moving-optimum model, KOPP and HERMISSON (2007, 2009a,b) studied the  
579 genetic basis of adaptation from new mutations and derived the distribution of adaptive  
580 substitutions (i.e, the distribution of the phenotypic effects of those mutations that arise  
581 and become fixed in a population); this approach has recently been generalized to multiple  
582 phenotypic traits by MATUSZEWSKI *et al.* (2014). The shape of this distribution resembles  
583 a Gamma-distribution with an intermediate mode. Thus, most substitutions are of inter-  
584 mediate effect with only a few large-effect alleles contributing to adaptation. The reason is  
585 that small-effect alleles – despite appearing more frequently than large-effect alleles – have  
586 only small effects on fitness (and are, hence, often lost due to genetic drift), while large-effect  
587 alleles might be removed because they “overshoot” the optimum (KOPP and HERMISSON  
588 2009b). A detailed comparison and discussion of the distribution of adaptive substitutions  
589 from *de-novo* mutations with (eq. 23) and without (KOPP and HERMISSON 2009b) genetic  
590 background variation is given in Supporting Information 2.

591 Here, we have studied the genetic basis of adaptation from standing genetic variation. We  
592 find that the distribution of substitutions from standing genetic variation depends on the  
593 distribution of standing genetic variants (i.e., distribution of alleles segregating in the popu-  
594 lation prior to the environmental change) and the intensity of selection. The former is shaped

595 primarily by the distribution of new mutations and the strength of stabilizing selection, which  
596 removes large-effect alleles. Depending on the speed of change  $v$ , we find two regimes that are  
597 characterized by separate distributions of standing substitutions. If the environment changes  
598 sufficiently fast, the distribution of adaptive substitutions resembles a lognormal distribu-  
599 tion with a strong contribution of small-effect alleles (eq. 19; Fig. 2). The reason is that, in  
600 the standing genetic variation, small-effect alleles are more frequent than large-effect alleles  
601 and might already segregate at appreciable frequency (so that they are not lost by genetic  
602 drift). With a moving optimum, they furthermore are the first to become positively selected,  
603 hence reducing the time they are under purifying selection. Finally, epistatic interactions  
604 between co-segregating alleles (or between a focal allele and the genetic background) also  
605 favor alleles of small effect. Consequently, when adapting from standing genetic variation,  
606 most substitutions are of small phenotypic effect.

607 The second regime occurs if the rate of environmental change  $v$  is very small. In this case,  
608 allele-frequency dynamics are dominated by genetic drift, and the distribution of adaptive  
609 substitutions reflects the approximately Gaussian distribution of standing genetic variants  
610 (eq. 25; Fig. S3\_2). It should be noted, however, that fixations under this regime take a very  
611 long time, similar to that of purely neutral substitutions (i.e., on the timescale of  $4N_e$ ).

612 Finally, we have studied the relative importance of standing genetic variation and *de-novo*  
613 mutations over the course of adaptation. As shown in Figures 7 and 8, the initial response  
614 to selection is almost entirely based on standing variation, with *de-novo* mutations becoming  
615 gradually more important. The time scale of this transition strongly depends on the rate  
616 of environmental change, but for slow or moderately fast change, it typically occurs over at  
617 least hundreds of generations (Figs. 8, S3\_8 and Figs. S3\_9, S3\_10). This observation is  
618 in contrast to results by HILL and RASBASH (1986b), who found that under strong artificial  
619 (i.e., truncation) selection in small populations ( $N = 20$ ), new mutations might contribute  
620 up to one third of the total response after as little as 20 generations. Our results show  
621 that the situation is very different for large populations under natural selection in gradually

622 changing environments. The likely reason for this difference is that truncation selection  
623 induces strong directional selection (corresponding to large  $v$ ) and only extreme phenotypes  
624 reproduce. Thus, truncation selection is much more efficient in maintaining large-effect *de-*  
625 *novo* mutations, while eroding genetic variation more quickly (because it introduces a large  
626 skew in the offspring distribution). However, the similarities and differences in the genetic  
627 basis of responses to artificial versus natural selection is an interesting topic—in particular,  
628 for the interpretation of the large amount of genetic data available from breeding programs  
629 (STERN and ORGONZO 2009)—that should be addressed in future studies.

630 Throughout this study, we have focused on adaptation to a moving optimum, that is, a sce-  
631 nario of gradual environmental change. An obvious question is how our results would change  
632 under the alternative scenario of a one-time sudden shift in the optimum (as assumed in  
633 numerous studies, e.g., ORR 1998; HERMISSON and PENNINGS 2005; CHEVIN and HOSPI-  
634 TAL 2008). While beyond the scope of this paper, our approach should, in principle, still be  
635 applicable. In particular, each focal allele still experiences a gradual change in its selection  
636 coefficient, due to the evolution of the genetic background. Unlike in the moving-optimum  
637 model, however, the selection coefficient *decreases*, as the mean phenotype gradually ap-  
638 proaches the new optimum. Hence, a suitably modified version of equation 13 would give  
639 the probability that a focal allele *establishes* in the population (i.e., escapes stochastic loss),  
640 but in the absence of continued environmental change, establishment does not guarantee  
641 fixation. In other words, alleles need to “race for fixation” before other competing alleles get  
642 fixed and they become deleterious (KOPP and HERMISSON 2007, 2009a). The dynamics of  
643 a mutation along its trajectory should therefore be even more complex than in the moving-  
644 optimum model, and show an even stronger dependence on the genetic background (CHEVIN  
645 and HOSPITAL 2008).

## 646 **Extinction and the rate of environmental change**

647 Recently, several experimental studies have explored how the rate of environmental change

648 affects the persistence of populations that rely on new mutations for adapting to a gradually  
649 changing environment (PERRON *et al.* 2008; BELL and GONZALEZ 2011; LINDSEY *et al.*  
650 2013). In line with theoretical predictions (BELL 2013), all studies found that “evolutionary  
651 rescue” is contingent on a small rate of environmental change. In particular, LINDSEY *et al.*  
652 (2013) evolved replicate populations of *E. coli* under different rates of increase in antibiotic  
653 concentration and found that certain genotypes were evolutionarily inaccessible under rapid  
654 environmental change, suggesting that “rapidly deteriorating environments not only limit  
655 mutational opportunities by lowering population size, but [...] also eliminate sets of mutations  
656 as evolutionary options”. This is in stark contrast to our prediction that faster environmental  
657 change can enable the population to remain better adapted and to traverse larger distances  
658 in phenotype space when standing genetic variation is the sole source for adaptation (Fig. 6  
659 and Figs S3\_6, S3\_7; in line with recent experimental observations; H. Teotonio, private  
660 communication). The difference between these results arises from the availability of the  
661 “adaptive material”. While *de-novo* mutations first need to appear and survive stochastic loss  
662 before becoming fixed, standing genetic variants are available right away and might already  
663 be segregating at appreciable frequency. Thus, in both cases, the rate of environmental  
664 change plays a critical, though antagonistic, role in determining the evolutionary options.  
665 While fast environmental change eliminates sets of new mutations, it simultaneously helps  
666 to preserve standing genetic variation until it can be picked-up by selection. Under slow  
667 change, in contrast, most large-effect alleles from the standing variation, by the time they  
668 are needed, are already eliminated by drift or stabilizing selection.

669 Our results also mean that, if the optimum stops moving at a given value  $z_{\text{opt,max}}$ , popula-  
670 tions will achieve a higher degree of adaptation (higher  $\bar{z}^*$ ) if the final optimum is reached  
671 fast rather than slowly (see also UECKER and HERMISSON 2014), at least if standing genetic  
672 variation is the sole source for adaptation. While this assumption is an obvious simplification,  
673 it may often be approximately true in natural populations. The same holds true in exper-  
674 imental populations, where selection is usually strong and the duration of the experiment



675 short, such that *de-novo* mutations can frequently be neglected (see Fig. 8).

## 676 **Testing the predictions**

677 The predictions made by our model can in principle be tested empirically, even though suit-  
678 able data might be sparse and experiments challenging. There is, of course, ample evidence  
679 for adaptation from standing genetic variation. For example, DOMINGUES *et al.* (2012)  
680 showed that camouflaging pigmentation of oldfield mice (*Peromyscus polionotus*) that have  
681 colonized Florida's Gulf Coast has evolved quite rapidly from a pre-existing mutation in the  
682 *Mc1r* gene; LIMBORG *et al.* (2014) investigated selection in two allochronic but sympatric  
683 lineages of pink salmon (*Oncorhynchus gorbuscha*) and identified 24 divergent loci that had  
684 arisen from different pools of standing genetic variation, and TURCHIN *et al.* (2012) showed  
685 that height-associated alleles in humans display a clear signal for widespread selection on  
686 standing genetic variation.

687 However, testing the predictions of our model requires, in addition, detailed knowledge of  
688 the genotype-phenotype relation. Currently, there is only a small (yet increasing) number of  
689 systems for which both a set of functionally validated beneficial mutations and their selec-  
690 tion coefficients under different environmental conditions are available (JENSEN 2014). Thus,  
691 estimating the distribution of standing substitutions will be challenging, because of the of-  
692 ten unknown phenotypic and fitness effects of beneficial mutations and the large number of  
693 replicate experiments needed to obtain a reliable empirical distribution. Furthermore, even if  
694 these problems were solved, small-effect alleles might not be detectable due to statistical lim-  
695 itations (OTTO and JONES 2000), and in certain limiting cases where the population quickly  
696 goes extinct (i.e., when the environment changes very fast), the distribution of adaptive sub-  
697 stitutions from standing genetic variation might be indistinguishable to that from *de-novo*  
698 substitutions (Fig. 5).

699 Recent developments in laboratory systems (MORRAN *et al.* 2009; PARTS *et al.* 2011), how-  
700 ever, have created opportunities for experimental evolution studies in which population size,

701 the selective regime and the duration of selection can be manipulated, and adaptation from  
702 *de-novo* mutations and standing genetic variation can be recorded (BURKE 2012). Applying  
703 these techniques in experiments in the vein of LINDSEY *et al.* (2013), but starting from a  
704 polymorphic population, should make it possible to test the relation between the rate of  
705 environmental change and population persistence, and to assess the probability of adapta-  
706 tion from standing genetic variation. First experiments along these lines are currently being  
707 carried out in populations of *C. elegans*, with the aim of determining the limits of adap-  
708 tation to different rates of increase in sodium chloride concentration (H. Teotonio, private  
709 communication). Furthermore, PENNINGS (2012) recently applied the HERMISSON and PEN-  
710 NINGS (2005) framework to show that standing genetic variation plays an important role in  
711 the evolution of drug-resistance in *HIV*, affecting up to 39% of patients (depending on treat-  
712 ment) and explaining why resistance mutations in patients who interrupt treatment are likely  
713 to become established within the first year. A similar approach should also be applicable  
714 to scenarios of gradual environmental change (e.g., evolution of resistance mutations under  
715 gradually increasing antibiotic concentrations).

## 716 **Conclusion**

717 As global climate change continues to force populations to respond to the altered environ-  
718 mental conditions, studying adaptation to changing environments – both empirically and  
719 theoretically – has become one of the main topics in evolutionary biology. Despite increased  
720 efforts, however, very little is known about the genetic basis of adaptation from standing  
721 genetic variation. Our analysis of the moving-optimum model shows that this process has,  
722 indeed, a very different genetic basis than that of adaptation from *de-novo* mutations. In  
723 particular, adaptation proceeds via the fixation many small-effect alleles (and just a few large  
724 ones). In accordance with previous studies, the adaptive process critically depends on the  
725 tempo of environmental change. Specifically, when populations adapt from standing genetic  
726 variation only, the potential for adaptation increases as the environment changes faster.

## 727 **Acknowledgements**

728 We thank R. Bürger, LM. Chevin, and C. Vogl for constructive comments on this manuscript.

729 This study was supported by Austrian Science Fund, FWF (grant P 22581-B17 to MK

730 and grant P22188 to Reinhard Bürger), Austrian Agency for International Cooperation in

731 Education and Research, OEAD (grant FR06/2014 to JH), Campus France (grant PHC

732 AMADEUS 31642SJ to MK), and a Writing-Up Fellowship from the Konrad Lorenz Institute

733 for Evolution and Cognition Research (KLI) to SM.

## LITERATURE CITED

- 734 BARRETT, R. D., and D. SCHLUTER, 2008 Adaptation from standing genetic variation.  
735 Trends Ecol. Evol. **23**: 38–44.
- 736 BARTON, N. H., and M. TURELLI, 1991 Natural and sexual selection on many loci. Genetics  
737 **127**: 229–55.
- 738 BELL, G., 2009 The oligogenic view of adaptation. Cold Spring Harbor Symposia on Quan-  
739 titative Biology **74**: 139–144.
- 740 BELL, G., 2013 Evolutionary rescue and the limits of adaptation. Philos. Tr. R. Soc. Lon.  
741 B **368**: 20120080.
- 742 BELL, G., and A. GONZALEZ, 2011 Adaptation and evolutionary rescue in metapopulations  
743 experiencing environmental deterioration. Science **332**: 1327–1330.
- 744 BULMER, M. G., 1980 *The mathematical theory of quantitative genetics*. Oxford University  
745 Press, Oxford.
- 746 BÜRGER, R., 2000 *The mathematical theory of selection, recombination, and mutation*. Wi-  
747 ley, Chichester.
- 748 BÜRGER, R., and M. LYNCH, 1995 Evolution and extinction in a changing environment: a  
749 quantitative genetic analysis. Evolution **49**: 151–163.
- 750 BURKE, M. K., 2012 How does adaptation sweep through the genome? Insights from long-  
751 term selection experiments. Proc. R. Soc. B **279**: 5029–5038.
- 752 CAPRIO, M., 2005 Levelscheme: A level scheme drawing and scientific figure preparation  
753 system for mathematica. Comput. Phys. Commun. **171**: 107 – 118.
- 754 CHARLESWORTH, B., 1993 Directional selection and the evolution of sex and recombination.  
755 Genetical Research Cambridge **61**: 205–224.
- 756 CHEVIN, L. M., 2013 Genetic constraints on adaptation to a changing environment. Evolu-  
757 tion **67**: 708–721.
- 758 CHEVIN, L. M., and F. HOSPITAL, 2008 Selective sweep at a quantitative trait locus in the  
759 presence of background genetic variation. Genetics **180**: 1645–1660.

- 760 COLLINS, S., J. DE MEAUX, and C. ACQUISTI, 2007 Adaptive walks toward a moving  
761 optimum. *Genetics* **176**: 1089–1099.
- 762 COMERON, J. M., A. WILLIFORD, and R. M. KLIMAN, 2008 The Hill-Robertson effect:  
763 evolutionary consequences of weak selection and linkage in finite populations. *Heredity*  
764 **100**: 19–31.
- 765 COOPER, T. F., E. A. OSTROWSKI, and M. TRAVISANO, 2007 A negative relationship  
766 between mutation pleiotropy and fitness effect in yeast. *Evolution* **61**: 1495–1499.
- 767 DOMINGUES, V. S., Y.-P. POH, B. K. PETERSON, P. S. PENNING, J. D. JENSEN, *et al.*,  
768 2012 Evidence of adaptation from ancestral variation in young populations of beach mice.  
769 *Evolution* **66**: 3209–3223.
- 770 EWENS, W. J., 2004 *Mathematical population genetics*. Springer-Verlag, Berlin, 2nd edition.
- 771 FOLEY, P., 1992 Small Population Genetic Variability at Loci Under Stabilizing Selection.  
772 *Evolution* **46**: 763–774.
- 773 GALASSI, M., J. DAVIES, J. THEILER, B. GOUGH, and G. JUNGMAN, 2009 *GNU Scientific*  
774 *Library - Reference Manual, Third Edition, for GSL Version 1.12 (3. ed.)*. Network  
775 Theory Ltd.
- 776 GILLESPIE, J. H., 1984 Molecular evolution over the mutational landscape. *Evolution* **38**:  
777 1116–1129.
- 778 GOMULKIEWICZ, R., R. D. HOLT, M. BARFIELD, and S. L. NUISMER, 2010 Genetics,  
779 adaptation, and invasion in harsh environments. *Evol. Appl.* **3**: 97–108.
- 780 GOMULKIEWICZ, R., and D. HOULE, 2009 Demographic and genetic constraints on evolu-  
781 tion. *Am. Nat.* **174**: E218–229.
- 782 HALLAUER, A., M. CARENA, and J. FILHO, 2010 *Quantitative Genetics in Maize Breeding*.  
783 Handbook of Plant Breeding. Springer.
- 784 HERMISSON, J., and P. S. PENNING, 2005 Soft sweeps: molecular population genetics of  
785 adaptation from standing genetic variation. *Genetics* **169**: 2335–2352.
- 786 HIETPAS, R. T., C. BANK, J. D. JENSEN, and D. N. A. BOLON, 2013 Shifting fitness

- 787 landscapes in response to altered environments. *Evolution* **67**: 3512–3522.
- 788 HILL, W. G., and J. RASBASH, 1986a Models of long-term artificial selection in finite  
789 population. *Genet. Res.* **48**: 41–50.
- 790 HILL, W. G., and J. RASBASH, 1986b Models of long-term artificial selection in finite  
791 population with recurrent mutation. *Genet. Res.* **48**: 125–131.
- 792 HILL, W. G., and A. ROBERTSON, 1966 The effect of linkage on limits to artificial selection.  
793 *Genet. Res.* **8**: 269–294.
- 794 JENSEN, J. D., 2014 On the unfounded enthusiasm for soft selective sweeps. *Nat. Commun.*  
795 **5**: 5281.
- 796 JONES, A. G., S. J. ARNOLD, and R. BÜRGER, 2004 Evolution and stability of the G-matrix  
797 on a landscape with a moving optimum. *Evolution* **58**: 1636–1654.
- 798 JONES, A. G., R. BÜRGER, S. J. ARNOLD, P. A. HOHENLOHE, and J. C. UYEDA, 2012  
799 The effects of stochastic and episodic movement of the optimum on the evolution of the  
800 G-matrix and the response of the trait mean to selection. *J. Evol. Biol.* **25**: 2010–2031.
- 801 KAUFFMAN, S. A. A., and S. LEVIN, 1987 Towards a general theory of adaptive walks on  
802 rugged landscapes. *J. Theor. Biol.* **128**: 11–45.
- 803 KIMURA, M., 1957 Some problems of stochastic processes in genetics. *Ann. Math. Stat.* **28**:  
804 882–901.
- 805 KIMURA, M., 1983 *The neutral theory of molecular evolution*. Cambridge University Press,  
806 Cambridge.
- 807 KIRKPATRICK, M., T. JOHNSON, and N. BARTON, 2002 General models of multilocus  
808 evolution. *Genetics* **161**: 1727–1750.
- 809 KOPP, M., and J. HERMISSON, 2007 Adaptation of a quantitative trait to a moving optimum.  
810 *Genetics* **176**: 715–718.
- 811 KOPP, M., and J. HERMISSON, 2009a The genetic basis of phenotypic adaptation I: Fixation  
812 of beneficial mutations in the moving optimum model. *Genetics* **182**: 233–249.
- 813 KOPP, M., and J. HERMISSON, 2009b The genetic basis of phenotypic adaptation II: The

- 814 distribution of adaptive substitutions in the moving optimum model. *Genetics* **183**: 1453–  
815 1476.
- 816 KOPP, M., and S. MATUSZEWSKI, 2014 Rapid evolution of quantitative traits: theoretical  
817 perspectives. *Evol. Appl.* **7**: 169–191.
- 818 LANDE, R., 1976 The maintenance of genetic variability by mutation in a polygenic character  
819 with linked loci. *Genet. Res.* **26**: 221–235.
- 820 LANDE, R., 1983 The response to selection on major and minor mutations affecting a metrical  
821 trait. *Heredity* **50**: 47–65.
- 822 LANDE, R., and S. SHANNON, 1996 The role of genetic variation in adaptation and popula-  
823 tion persistence changing environment. *Evolution* **50**: 434–437.
- 824 LANG, G. I., D. BOTSTEIN, and M. M. DESAI, 2011 Genetic variation and the fate of  
825 beneficial mutations in asexual populations. *Genetics* **188**: 647–661.
- 826 LIMBORG, M. T., R. K. WAPLES, J. E. SEEB, and L. W. SEEB, 2014 Temporally isolated  
827 lineages of pink salmon reveal unique signatures of selection on distinct pools of standing  
828 genetic variation. *Heredity* **105**: 741–751.
- 829 LINDSEY, H. A., J. GALLIE, S. TAYLOR, and B. KERR, 2013 Evolutionary rescue from  
830 extinction is contingent on a lower rate of environmental change. *Nature* **494**: 463–467.
- 831 LYNCH, M., W. GABRIEL, and A. M. WOOD, 1991 Adaptive and demographic responses  
832 of plankton populations to environmental change. *Limnol. Oceanogr.* **36**: 1301–1312.
- 833 LYNCH, M., and R. LANDE, 1993 Evolution and extinction in response to environmental  
834 change. In P. Kareiva, J. G. Kingsolver and R. B. Juey, editors, *Biotic interactions and*  
835 *global change*. Sinauer, Sunderland, 43–53.
- 836 MARTIN, G., and T. LENORMAND, 2006a A general multivariate extension of Fisher’s ge-  
837 ometrical model and the distribution of mutation fitness effects across species. *Evolution*  
838 **60**: 893–907.
- 839 MARTIN, G., and T. LENORMAND, 2006b The fitness effect of mutations in stressful envi-  
840 ronments: a survey in the light of fitness landscape models. *Evolution* **60**: 2413–2427.

- 841 MATUSZEWSKI, S., J. HERMISSON, and M. KOPP, 2014 Fisher's geometric model with a  
842 moving optimum. *Evolution* **68**: 2571–2588.
- 843 MORRAN, L. T., M. D. PARMENTER, and P. C. PHILLIPS, 2009 Mutation load and rapid  
844 adaptation favour outcrossing over self-fertilization. *Nature* **462**: 350–352.
- 845 ORR, H. A., 1998 The population genetics of adaptation: the distribution of factors fixed  
846 during adaptive evolution. *Evolution* **52**: 935–949.
- 847 ORR, H. A., 2000 Adaptation and the cost of complexity. *Evolution* **54**: 13–20.
- 848 ORR, H. A., 2002 The population genetics of adaptation: the adaptation of DNA sequences.  
849 *Evolution* **56**: 1317–1330.
- 850 ORR, H. A., 2005a The genetic theory of adaptation: a brief history. *Nat. Rev. Gen.* **6**:  
851 119–127.
- 852 ORR, H. A., 2005b Theories of adaptation: what they do and don't say. *Genetica* **123**:  
853 3–13.
- 854 ORR, H. A., and A. J. BETANCOURT, 2001 Haldane's sieve and adaptation from standing  
855 genetic variation. *Genetics* **157**: 875–884.
- 856 OTTO, S. P., and C. D. JONES, 2000 Detecting the undetected: estimating the total number  
857 of loci underlying a quantitative trait. *Genetics* **156**: 2093–2107.
- 858 PARTS, L., F. A. CUBILLOS, J. WARRINGER, K. JAIN, F. SALINAS, *et al.*, 2011 Revealing  
859 the genetic structure of a trait by sequencing a population under selection. *Genome Res.*  
860 **21**: 1131–1138.
- 861 PENNINGS, P. S., 2012 Standing genetic variation and the evolution of drug resistance in  
862 HIV. *PLoS Comput. Biol.* **8**: e1002527.
- 863 PERRON, G. G., A. GONZALEZ, and A. BUCKLING, 2008 The rate of environmental change  
864 drives adaptation to an antibiotic sink. *J. Evol. Biol.* **21**: 1724–1731.
- 865 ROCKMAN, M. V., 2012 The QTN program and the alleles that matter for evolution: all  
866 that's gold does not glitter. *Evolution* **66**: 1–17.
- 867 SLATKIN, M., and R. LANDE, 1976 Niche width in a fluctuating environment-density inde-



- 868 pendent model. *Am. Nat.* **110**: pp. 31–55.
- 869 SMITH, N. G. C., and A. EYRE-WALKER, 2002 Adaptive protein evolution in *Drosophila*.  
870 *N* **415**: 1022–1024.
- 871 SPEED, T. P., 2005 *Genetic Map Functions*. John Wiley & Sons, Ltd, 2nd edition.
- 872 STERN, D. L., and V. ORGONZO, 2009 Is genetic evolution predictable? *Science* **323**:  
873 746–751.
- 874 TOBIN, D., A. KAUSE, E. A. MÄNTYSAARI, S. A. MARTIN, D. F. HOULIHAN, *et al.*,  
875 2006 Fat or lean? The quantitative genetic basis for selection strategies of muscle and  
876 body composition traits in breeding schemes of rainbow trout (*Oncorhynchus mykiss*).  
877 *Aquaculture* **261**: 510–521.
- 878 TURCHIN, M. C., C. W. CHIANG, C. D. PALMER, S. SANKARARAMAN, D. REICH, *et al.*,  
879 2012 Evidence of widespread selection on standing variation in europe at height-associated  
880 snps. *Nat. Gen.* **44**: 1015–1019.
- 881 UECKER, H., and J. HERMISSON, 2011 On the fixation process of a beneficial mutation in  
882 a variable environment. *Genetics* **188**: 915–930.
- 883 UECKER, H. OTTO, S. P., and J. HERMISSON, 2014 Evolutionary rescue in structured  
884 populations. *Am. Nat.* **183**: E17–E35.
- 885 WICHMAN, H. A., M. R. BADGETT, L. A. SCOTT, C. M. BOULIANNE, and J. J. BULL,  
886 1999 Different trajectories of parallel evolution during viral adaptation. *Science* **285**: 422–  
887 424.
- 888 WRICKE, G., and E. WEBER, 1986 *Quantitative genetics and selection in plant breeding*.  
889 Walter de Gruyter.
- 890 ZHANG, X. S., 2012 Fisher’s geometrical model of fitness landscape and variance in fitness  
891 within a changing environment. *Evolution* **66**: 2350–2368.

## APPENDIX

### 892 **Appendix 1: Theoretical Background**

893 In this Appendix, we briefly recapitulate results from previous studies that form the basis  
894 for our analytical derivations.

### 895 **The probability of adaptation from standing genetic variation for a single bi-** 896 **allelic locus after a sudden environmental change**

897 HERMISSON and PENNINGS (2005) studied the situation where the selection scheme at a  
898 single bi-allelic locus changes following a sudden environmental change. In particular, they  
899 derived the probability for a mutant allele to reach fixation that was neutral or deleterious  
900 prior to the change but has become beneficial in the new environment. In the continuum  
901 limit for allele frequencies this probability is given by

$$P_{SGV} = \int_0^1 \rho(x) \Pi_x dx, \quad (\text{A1})$$

902 where  $\rho(x)$  is the density function for the allele frequency  $x$  of the mutant allele in mutation-  
903 selection-drift balance and  $\Pi_x$  denotes its fixation probability.

904 For a mutant allele present at frequency  $x$  and with selective advantage  $s_b$  in the new envi-  
905 ronment, the fixation probability is given by (KIMURA 1957)

$$\Pi_x(s_b) \approx \frac{1 - \exp[-4N_e s_b x]}{1 - \exp[-4N_e s_b]}. \quad (\text{A2})$$

906 There are two points to make here. First, mutational effects in the HERMISSON and PEN-  
907 NINGS (2005) model are directly proportional to fitness, whereas mutations in our model  
908 affect a phenotype under selection. Second, in our framework,  $s_b$  denotes the (beneficial)

909 selection coefficient for heterozygotes.

910 Approximations for  $\rho(x)$  can be derived from standard diffusion theory (EWENS 2004; for  
911 details see HERMISSON and PENNINGS 2005). If the mutant allele was neutral prior to the  
912 change in the selection scheme

$$\rho(x) = Cx^{\Theta-1} \frac{1-x^{1-\theta}}{x-1}. \quad (\text{A3})$$

913 Here,  $C = (\gamma + \psi(\theta))^{-1}$  denotes a normalization constant where  $\gamma \approx 0.577$  is Euler's gamma  
914 and  $\psi(\cdot)$  is the polygamma function. Similarly, if the mutant allele was deleterious before the  
915 environmental change (with negative selection coefficient  $s_d$ ) the allele-frequency distribution  
916 is given by

$$\rho(x) = C \frac{(1 - \exp[-(1-x)4N_e|s_d|]) x^{\theta-1}}{x-1}, \quad (\text{A4})$$

917 where  $C = ({}_1F_1(0, \theta, 4N_e|s_d|))^{-1}$  denotes a normalization constant and  ${}_1F_1(a, b, c)$  is the hy-  
918 pergeometric function. If the allele was sufficiently deleterious ( $4N_e|s_d| \geq 10$ ), equation (A4)  
919 can further be approximated as

$$\rho(x) = Cx^{\theta-1} \exp[-4N_e|s_d|x], \quad (\text{A5})$$

920 where  $C = \left(\frac{\gamma[\theta, 4N_e|s_d|]}{(4N_e|s_d|)^\theta}\right)^{-1}$  again denotes a normalization constant with  $\gamma[a, b] = \int_0^b t^{a-1} \exp[-t] dt$   
921 denoting the lower incomplete gamma function.

922 Finally, the probability that a population successfully adapts from standing genetic variation  
923 can be derived as

$$\begin{aligned}
 P_{\text{SGV}} &= 1 - \left(1 + \frac{4N_e s_b}{4N_e |s_d| + 1}\right)^{-\theta} \\
 &= 1 - \exp \left[ -\theta \log \left[ \frac{4N_e s_b}{4N_e |s_d| + 1} \right] \right].
 \end{aligned}
 \tag{A6}$$

924 **Fixation probabilities under time-inhomogeneous selection**

925 In gradually changing environments, the selection coefficient of a given (mutant) allele is  
 926 not fixed but changes over time (i.e., as the position of the optimum changes). UECKER  
 927 and HERMISSON (2011) recently developed a mathematical framework based on branching-  
 928 process theory to describe the fixation process of a beneficial allele under temporal variation  
 929 in population size and selection pressures. They showed that the probability of fixation of a  
 930 mutation starting with  $n$  initial copies is given by

$$\Pi_{\text{fix}}(n) = 1 - \left(1 - \frac{1}{\varphi}\right)^n,
 \tag{A7a}$$

931 where

$$2\varphi = 1 + \int_0^\infty (N(0)/N_e(t)) \exp \left[ -\int_0^t s(\tau) d\tau \right] dt.
 \tag{A7b}$$

932

933 Assuming that the population size remains constant and that the selection coefficient in-  
 934 creases linearly in time,  $s(t) = s_d + s_v t$ , equation (A7a) becomes

$$\Pi_{\text{fix}} = 1 - \left(1 - \left[1 + \frac{1}{2} \sqrt{\frac{\pi}{2s_v}} \exp \left( \frac{s_d^2}{2s_v} \right) \operatorname{erfc} \left( \frac{s_d}{\sqrt{2s_v}} \right) \right]^{-1}\right)^n,
 \tag{A8}$$

935 where  $\operatorname{erfc}(\cdot)$  denotes the complementary Gaussian error function.

## SUPPORTING INFORMATION

### <sup>936</sup> **Supporting Information 1: Limited Recombination**

**Figure S1\_1** – The distribution of adaptive substitutions from standing genetic variation for free recombination (dark bins) compared to that for limited recombination (light bins). The black line corresponds to the analytical prediction (eq. 19).  $\sigma_g^2$  is given by equation (16). Fixed parameters:  $\sigma_s^2 = 50$ ,  $N = 2500$ ,  $v = 0.001$ ,  $\sigma_m^2 = 0.05$ .

937

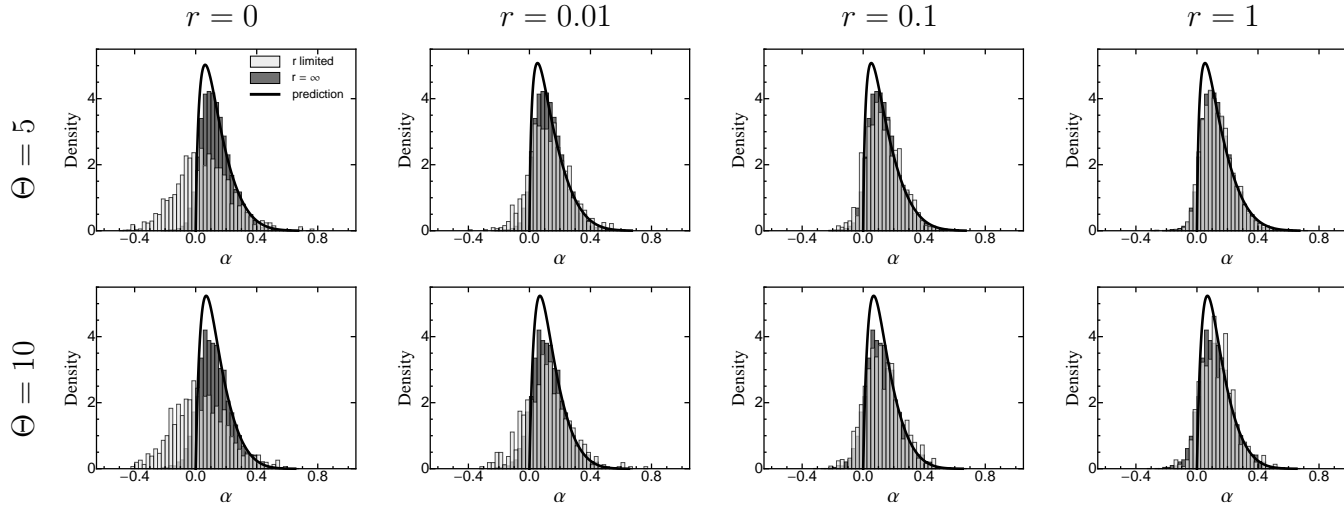

938

**Figure S1\_2** – The distribution of adaptive substitutions from standing genetic variation for free recombination (dark bins) compared to that for limited recombination (light bins). The black line corresponds to the analytical prediction (eq. 19).  $\sigma_g^2$  is given by equation (16). Fixed parameters:  $\Theta = 5$ ,  $N = 2500$ ,  $v = 0.001$ ,  $\sigma_m^2 = 0.05$ .

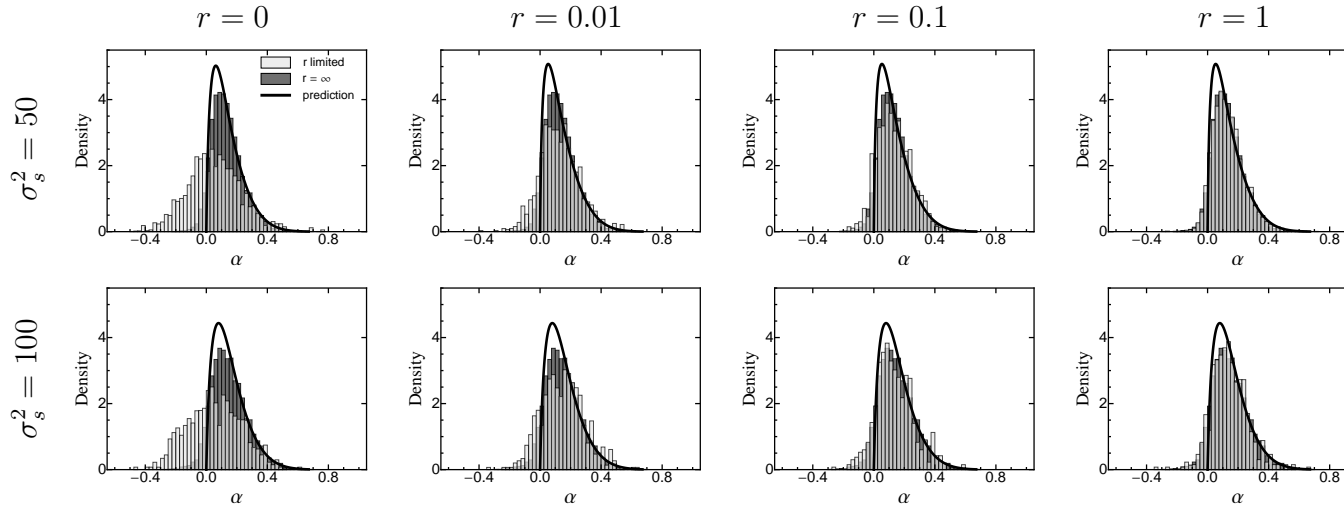

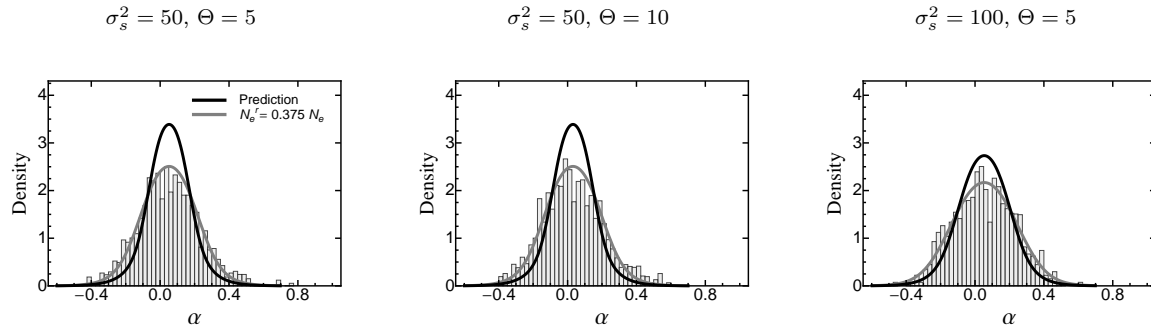

**Figure S1\_3** – The distribution of adaptive substitutions from standing genetic variation for complete linkage (no recombination). The black and the grey line corresponds to the analytical prediction (eq. 25) that are centred around the mean of the individual-based simulation. For the grey line  $N_e$  has been adjusted by a factor 0.385 to match the distribution from the individual-based simulations. Other parameters:  $v = 0.001$ ,  $r = 0$ ,  $N = 2500$ ,  $\sigma_m^2 = 0.05$ .

939 The individual-based simulation results presented in the main text were obtained under  
 940 the assumption of free recombination. In this Supplementary Information, we relax this  
 941 assumption and study the effects of linkage (i.e., limited recombination).

942 We first clarify the meaning of the recombination parameter  $r$ , which determines the mean  
 943 number of crossover events per meiosis. By definition, the simulated genome corresponds  
 944 to a single chromosome of length  $D_G = r \cdot 100\text{cM}$ , and the mean distance between two  
 945 randomly chosen sites is  $\frac{1}{3}D_G$ . The mean distance between two adjacent polymorphic loci is  
 946  $D_{G,\text{adjacent}} = \frac{1}{|\mathcal{G}|}D_{G+1}$ , where  $\mathcal{G}$  is the mean number of polymorphic loci, which depends on  $\Theta$   
 947 and  $\sigma_s^2$  (eq. 26).

948 The corresponding recombination rate  $\tau$  between two polymorphic loci is given by the inverse  
 949 of Haldane’s mapping function (SPEED 2005), that is,

$$\tau = \frac{1}{2} (1 - \exp[-2D_G]), \quad (\text{S1})$$

950 see Table S1\_1.

**Table S1\_1** – The classical population genetic recombination rate  $\tau$  (eq. S1) between two adjacent loci for different values of  $\sigma_s^2$ ,  $\Theta$  and  $r$ . Other parameters:  $\sigma_m^2 = 0.05$ .

|     |                        | $r$     |      |       |       |      |
|-----|------------------------|---------|------|-------|-------|------|
|     |                        | 0       | 0.01 | 0.1   | 1     |      |
| 952 | $(\Theta, \sigma_s^2)$ | (5/50)  | 0    | 0.019 | 0.16  | 0.49 |
|     |                        | (10/50) | 0    | 0.01  | 0.089 | 0.43 |
|     |                        | (5/100) | 0    | 0.017 | 0.15  | 0.49 |

953 The effect of limited recombination on the distribution of adaptive substitutions from stand-  
 954 ing genetic variation is illustrated in Figures S1\_1 and S1\_2. For  $r = 1$  (corresponding to a  
 955 genome length of 100cM and an average recombination rate  $\tau$  of close to 0.5, see table S1\_1),  
 956 the distribution is essentially identical to that for linkage equilibrium. As  $r$  decreases, the  
 957 distribution progressively shifts to the left, becomes more symmetric and includes more and  
 958 more alleles with negative phenotypic effect. For  $r = 0$  (corresponding to complete linkage  
 959 or asexual reproduction), it resembles the distribution for “drift-driven” evolution (i.e., when  
 960 selection is not efficient; Fig. S3\_2). The reason is that fixation involves entire haplotypes  
 961 carrying multiple mutations, whose (positive and negative) effects largely cancel. From a  
 962 different perspective, limited recombination leads to Hill-Robertson interference between co-  
 963 segregating alleles (HILL and ROBERTSON 1966), which in many respects corresponds to a  
 964 decrease in effective population size  $N_e$  (COMERON *et al.* 2008), which in turn reduces the  
 965 efficacy of selection. Note, however, that unlike in the case of a slowly changing environment  
 966 (Fig. S3\_2) reducing  $N_e$  also affects the equilibrium allele-frequency distribution  $\rho(x, \alpha)$  (by  
 967 reducing the strength of selection against large-effect alleles). In line with previous simulation  
 968 results (COMERON *et al.* 2008), we find that equation (25) provides a very good fit, when  $N_e$   
 969 is set to 38.5% of its original value.



970 **Supporting Information 2: The distribution of adaptive substitutions from *de-***  
971 ***novo* mutations with and without genetic background variation**

972 There are two ways in which the distribution of adaptive substitutions from standing genetic  
973 variation can be compared to that from *de-novo* mutations. The first comparison consid-  
974 ers a population without genetic background variation. This is the situation studied by  
975 KOPP and HERMISSON (2009a), where an essentially monomorphic population performs an  
976 adaptive walk following a moving optimum. The second situation is the one described by  
977 equation (23), where new mutations interact with a genetic background of constant variance  
978 (this background is presumably itself constantly replenished by new mutations). Analytical  
979 predictions for all three distributions are compared in Figures. S2\_1, S2\_2 and S2\_3. It  
980 can be seen that the adaptive-walk prediction (eq. 14 in KOPP and HERMISSON 2009b; red  
981 line) is always shifted towards larger  $\alpha$  compared to the distribution of adaptive substitutions  
982 from standing genetic variation (eq. 19, black line). The predicted distribution from *de-novo*  
983 mutations in the presence of genetic background variation (eq. 23, grey curve) shifts from  
984 the latter to the former as  $v$  increases. The reason is that, for small  $v$ , the fixation of both  
985 standing variants and new mutations in the presence of background variation is strongly  
986 constrained by the equilibrium lag (eq. 9). For large  $v$ , in contrast, the lag is large and adap-  
987 tation is primarily limited by the available alleles, independent of their source and initial  
988 frequency (mutation-limited regime *sensu* KOPP and HERMISSON 2009b). Note, however,  
989 that in both limiting cases, equation (19) is a poor predictor for the simulated substitutions  
990 from standing variation (Fig. 5, S3\_2). Nevertheless, it remains true that adaptive substi-  
991 tutions from new mutations are generally smaller than those from new mutations, with or  
992 without genetic background variation.

**Figure S2\_1** – Comparison of the analytical predictions for the distribution of adaptive substitutions from standing genetic variation and *de-novo* mutations. The black line corresponds to eq. (19), with the genetic background variation  $\sigma_g^2$  determined by the SHC approximation (eq. 16). The grey curve gives the analytical prediction for substitutions from *de-novo* mutations under the assumption that the phenotypic lag  $\delta_{eq}$  has reached an equilibrium (eq. 23). The red line gives the analytical prediction for the first substitution from *de-novo* mutations under the adaptive-walk assumption that there is no genetic background variation (KOPP and HERMISSON 2009b, eq. 14). Note that, for some parameter combinations, the simulated distribution from standing variation deviates from eq. (19). In particular, for small  $v$ , it approaches the “neutral” prediction eq. (25, see Fig. 3), and for large  $v$ , it may approach the distribution from new mutations, eq. (23), see Fig. 5. Fixed parameters:  $\Theta = 2.5$ ,  $N = 2500$ ,  $\sigma_m^2 = 0.05$ .

993

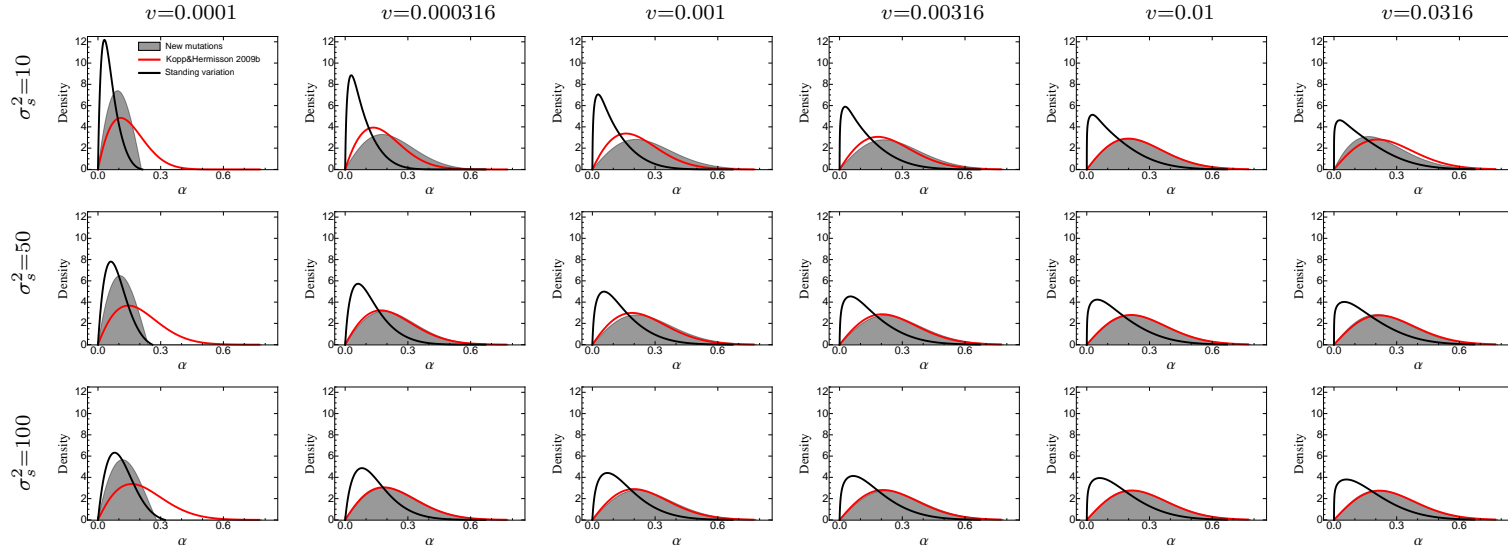

994

**Figure S2\_2** – Comparison of the analytical predictions for the distribution of adaptive substitutions from standing genetic variation and *de-novo* mutations. For further details see Fig. S2\_1. Fixed parameters:  $\Theta = 5$ ,  $N = 2500$ ,  $\sigma_m^2 = 0.05$ .

995

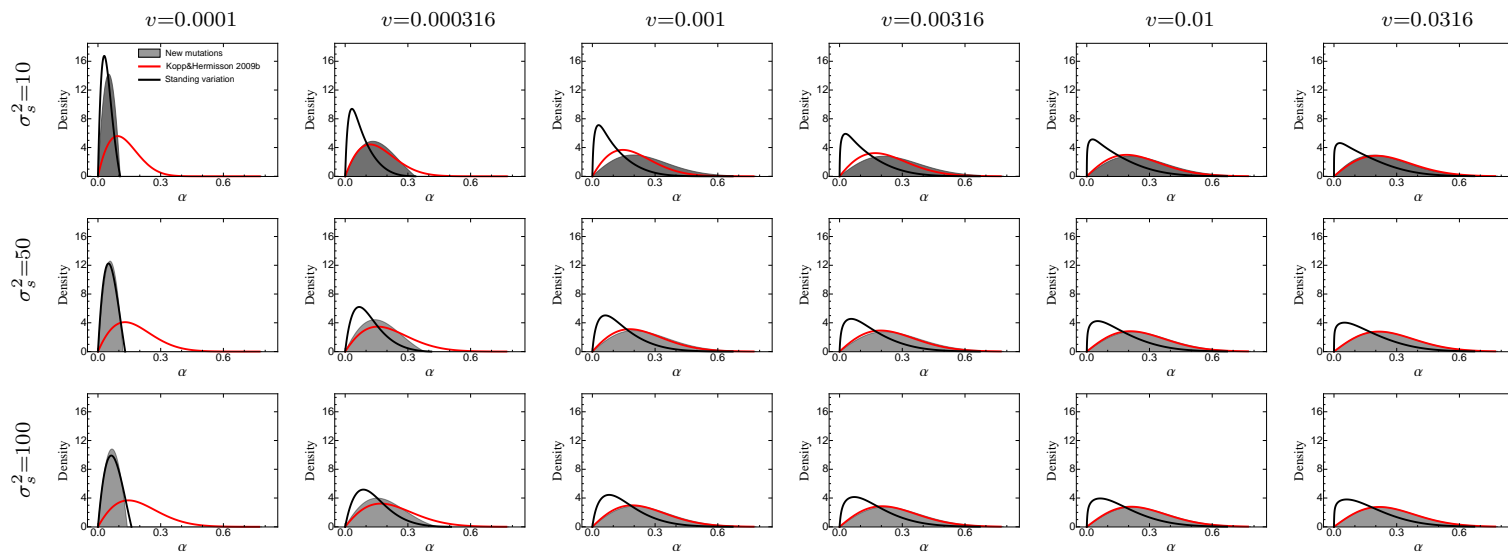

996

**Figure S2\_3** – Comparison of the analytical predictions for the distribution of adaptive substitutions from standing genetic variation and *de-novo* mutations. For further details see Fig. S2\_1. Fixed parameters:  $\Theta = 10$ ,  $N = 2500$ ,  $\sigma_m^2 = 0.05$ .

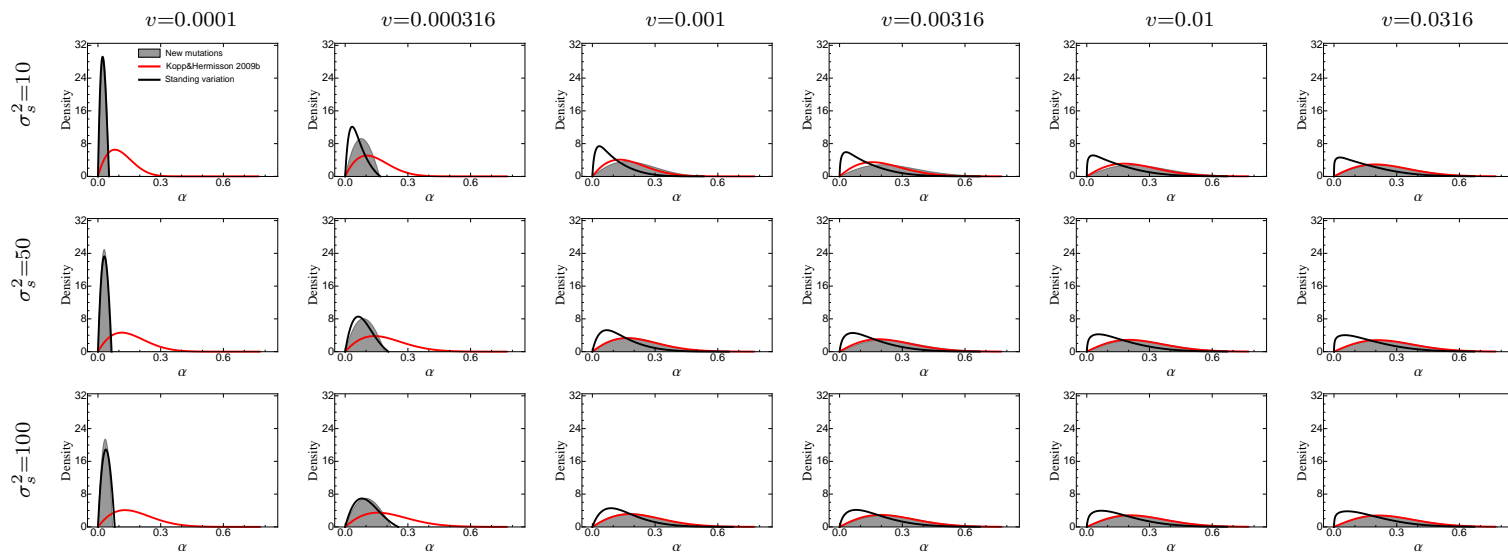

997

998

### 999 **Supporting Information 3: Supporting Figures**

**Figure S3\_1** – The probability for a mutant allele to adapt from standing genetic variation as a function of the rate of environmental change  $v$ . Solid lines correspond to the analytical prediction (eq. 14), the grey dashed line shows the probability for a neutral allele ( $\alpha = 0$ ; eq. 15), and symbols give results from Wright-Fisher simulations. The phenotypic effect size  $\alpha$  of the mutant allele ranges from  $0.5\sigma_m$  (top line; black) to  $3\sigma_m$  (bottom line; purple) with increments of  $0.5\sigma_m$ . The figures in each parameter box (per locus mutation rate  $\theta$ , width of fitness landscape  $\sigma_s^2$ ) correspond to different values of the genetic background variation  $\sigma_g^2$  with  $\sigma_g^2 = 0$  (no background variation; top left),  $\sigma_g^2 = 0.005$  (top right),  $\sigma_g^2 = 0.01$  (bottom left) and  $\sigma_g^2 = 0.05$  (bottom right). Other parameters:  $N_e = 25000$ ,  $\sigma_m^2 = 0.05$ .

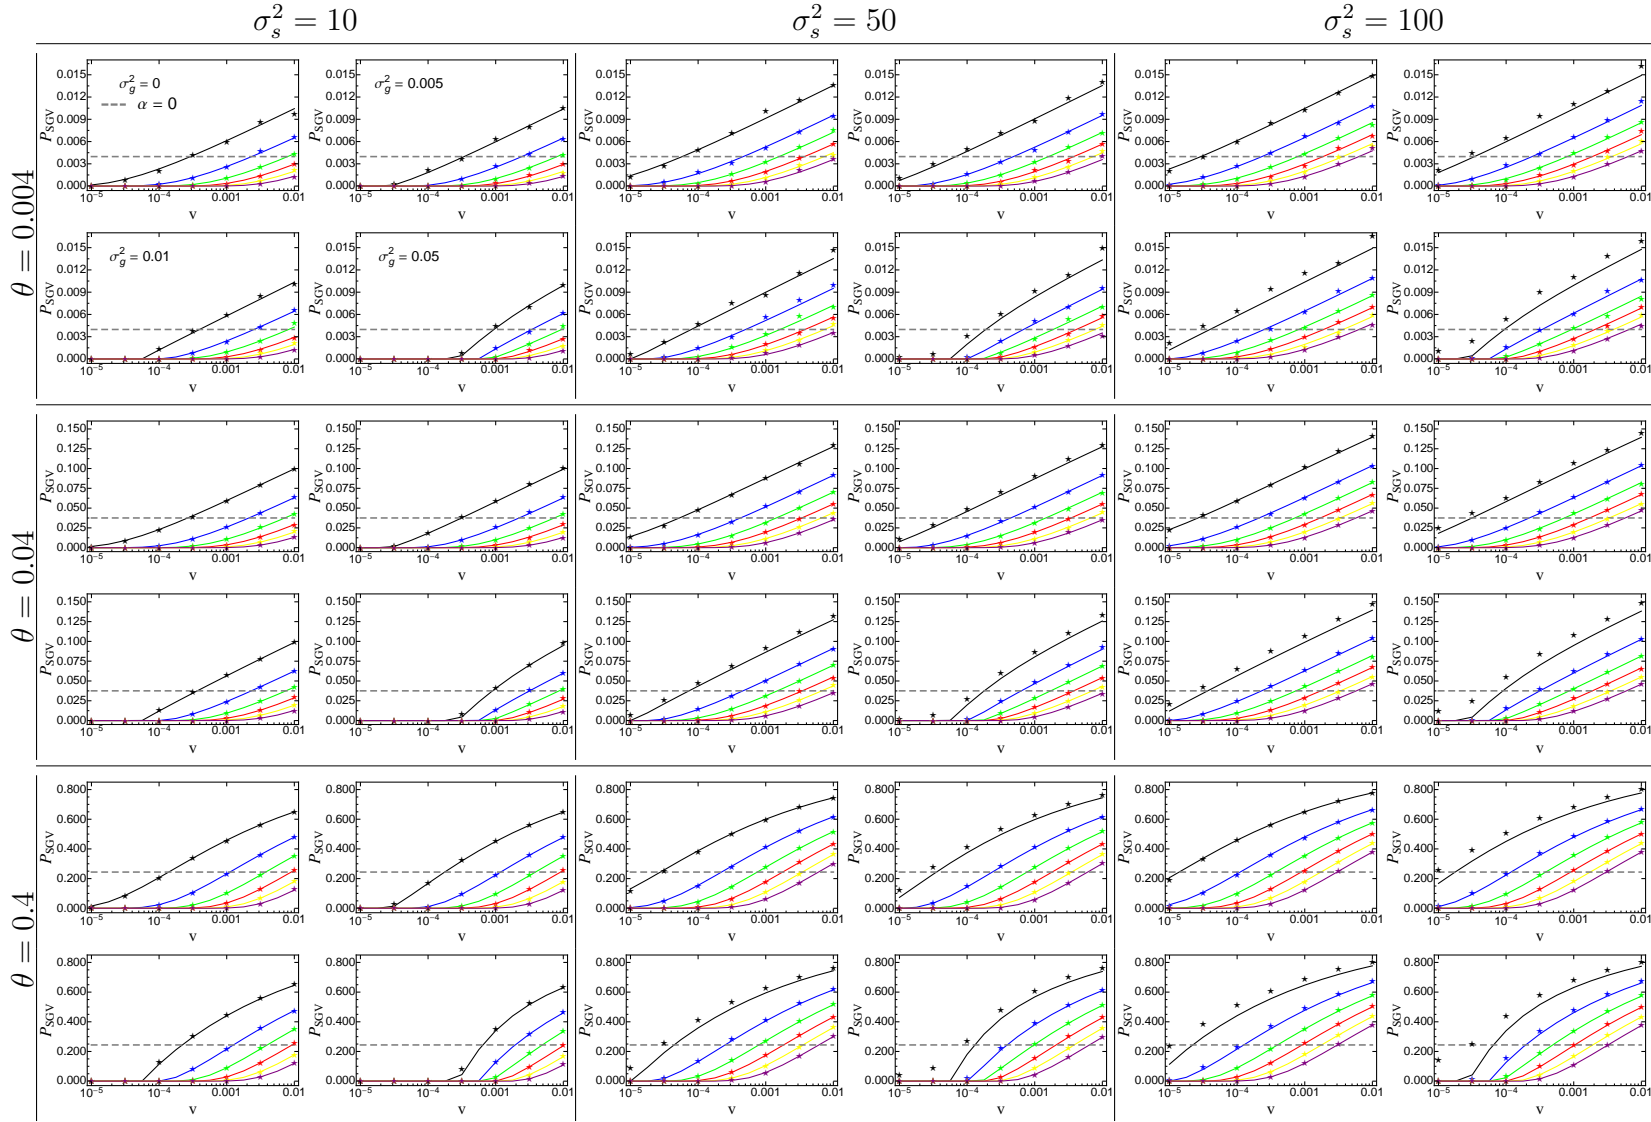

1000

62

1001

**Figure S3\_2** – The distribution of adaptive substitutions from standing genetic variation in the case of slow environmental change ( $v = 10^{-5}$ ). Histograms show results from individual-based simulations. The blue line gives the analytical prediction (eq. 25), with  $\sigma_g^2$  given by eq. 16), which assumes a neutral fixation probability. Fixed parameters:  $\sigma_m^2 = 0.05$ .

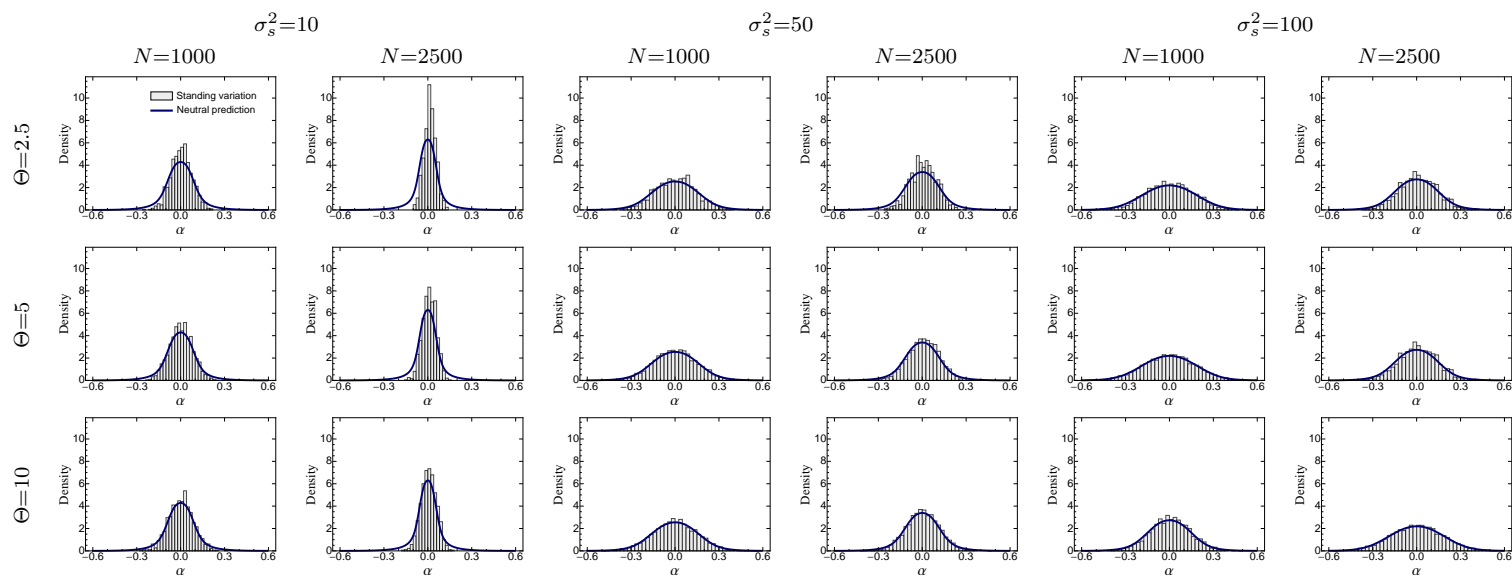

1002

1003

**Figure S3\_3** – The average number of fixed adaptive substitutions from standing genetic variation,  $|\mathcal{G}|_{\text{fix}}$ , as a function of the rate of environmental change  $v$ , when standing genetic variation is the sole source for adaptation. Symbols show results from individual-based simulations (averaged over 100 replicate runs). The black line gives the analytical prediction (eq. 27) and the grey line corresponds to the average number of neutral fixations ( $|\mathcal{G}|_{\text{fix}, v \rightarrow 0} = |\mathcal{G}| \int_{-\infty}^{\infty} p(\alpha) \Pi_{\text{seg}, v \rightarrow 0}(\alpha) d\alpha$ ). In both cases,  $\sigma_g^2$  was taken from equation (16). Error bars for standard errors are contained within the symbols. Fixed parameters:  $N = 1000$ ,  $\sigma_m^2 = 0.05$ .

1004

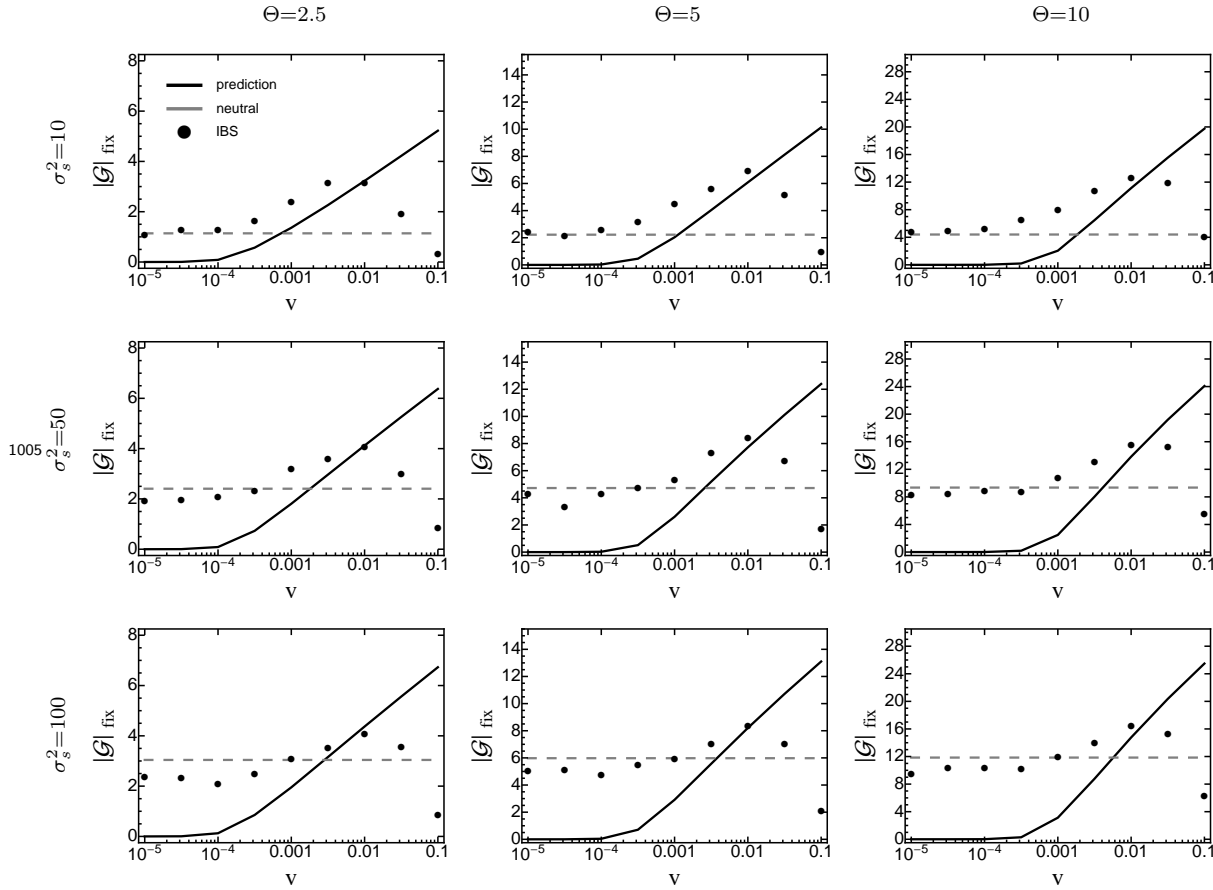



**Figure S3\_4** – The average number of fixed adaptive substitutions from standing genetic variation,  $|\mathcal{G}|_{\text{fix}}$ , as a function of the rate of environmental change  $v$ , when standing genetic variation is the sole source for adaptation. Symbols show results from individual-based simulations (averaged over 100 replicate runs). The black line gives the analytical prediction (eq. 27) and the grey line corresponds to the average number of neutral fixations ( $|\mathcal{G}|_{\text{fix}, v \rightarrow 0} = |\mathcal{G}| \int_{-\infty}^{\infty} p(\alpha) \Pi_{\text{seg}, v \rightarrow 0}(\alpha) d\alpha$ ). In both cases,  $\sigma_g^2$  was taken from equation (16). Error bars for standard errors are contained within the symbols. Fixed parameters:  $N = 2500$ ,  $\sigma_m^2 = 0.05$ .

1006

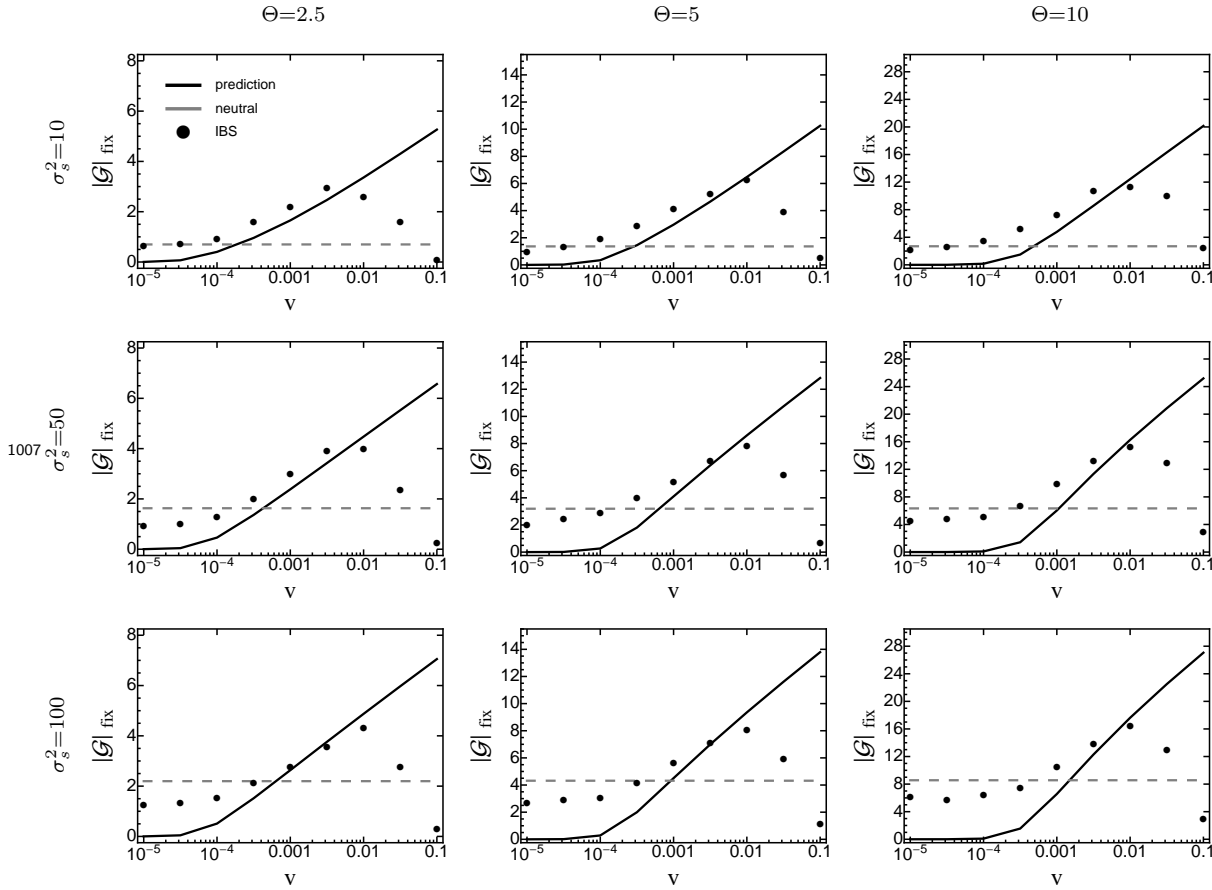

**Figure S3\_5** – The average number of fixed adaptive substitutions from standing genetic variation,  $|\mathcal{G}|_{\text{fix}}$ , as a function of the rate of environmental change  $v$ , when standing genetic variation is the sole source for adaptation. Symbols show results from individual-based simulations (averaged over 100 replicate runs). The black line gives the analytical prediction (eq. 27) and the grey line corresponds to the average number of neutral fixations ( $|\mathcal{G}|_{\text{fix}, v \rightarrow 0} = |\mathcal{G}| \int_{-\infty}^{\infty} p(\alpha) \Pi_{\text{seg}, v \rightarrow 0}(\alpha) d\alpha$ ). In both cases,  $\sigma_g^2$  was taken from equation (16). Error bars for standard errors are contained within the symbols. Fixed parameters:  $N = 5000$ ,  $\sigma_m^2 = 0.05$ .

1008

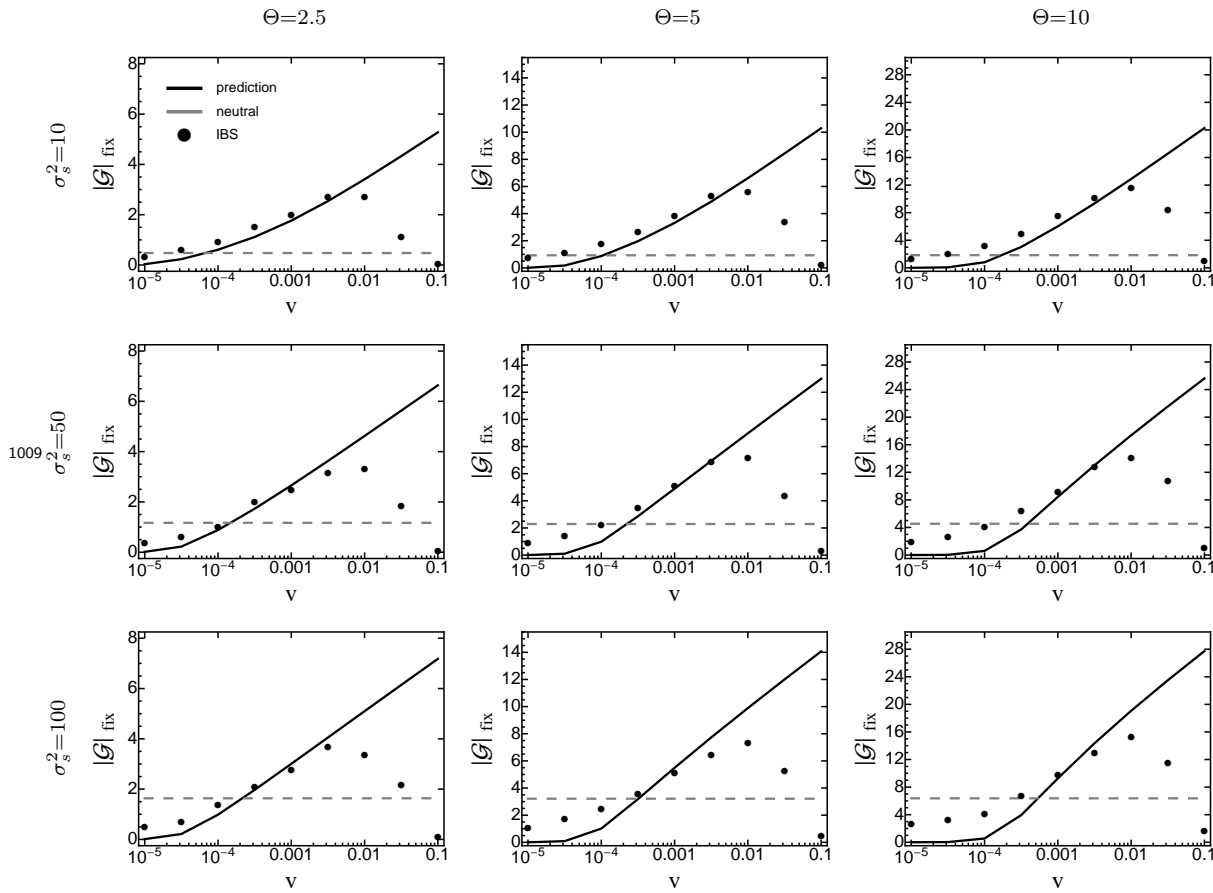

**Figure S3\_6** – The average distance traversed in phenotype space,  $z^*$ , as a function of the rate of environmental change  $v$ , when standing genetic variation is the sole source for adaptation. Symbols show results from individual-based simulations (averaged over 100 replicate runs). The black line gives the analytical prediction (eq. 28), with  $\sigma_g^2$  taken from equation (16). The grey-dashed line gives the critical rate of environmental change (eq. 29). Error bars for standard errors are contained within the symbols. Fixed parameters:  $N = 1000$ ,  $\sigma_m^2 = 0.05$ .

1010

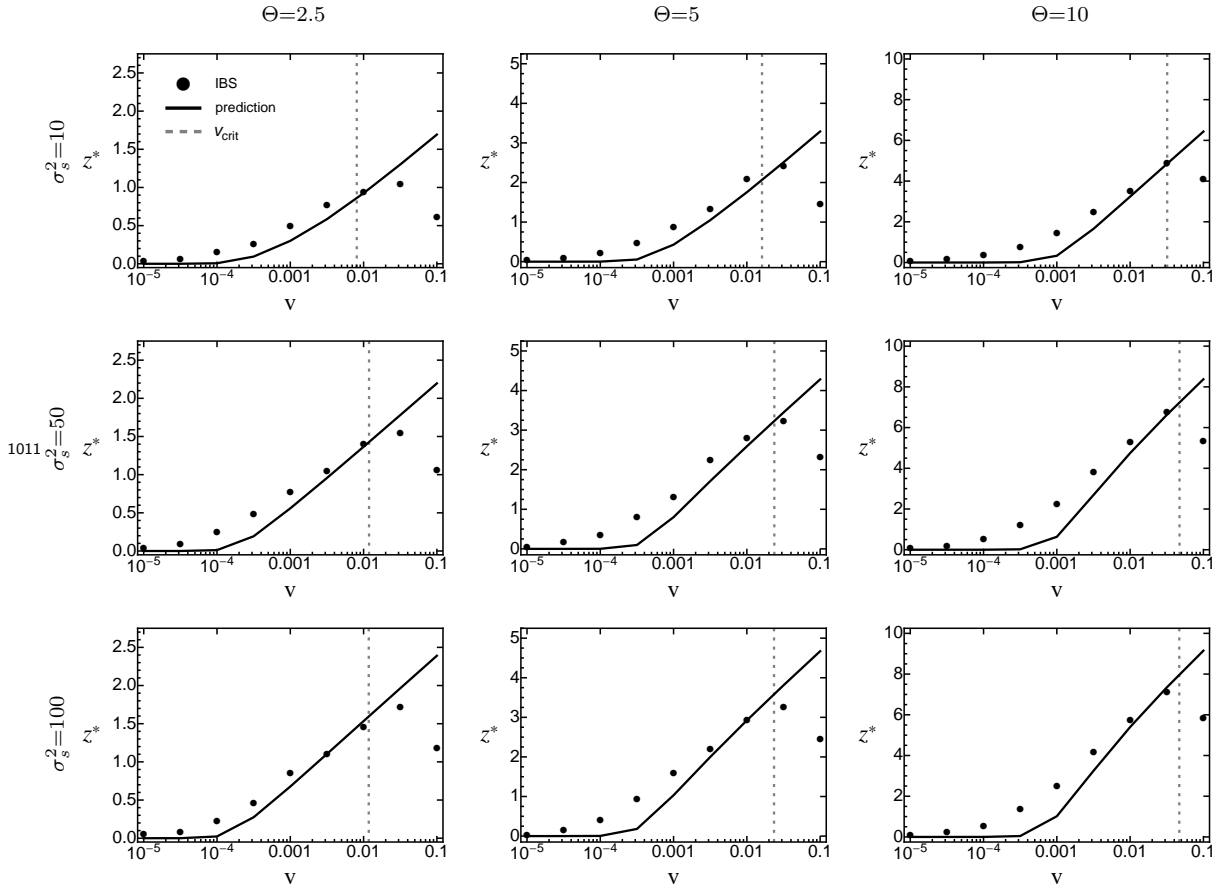

**Figure S3\_7** – The average distance traversed in phenotype space,  $z^*$ , as a function of the rate of environmental change  $v$ , when standing genetic variation is the sole source for adaptation. Symbols show results from individual-based simulations (averaged over 100 replicate runs). The black line gives the analytical prediction (eq. 28), with  $\sigma_g^2$  taken from equation (16). The grey-dashed line gives the critical rate of environmental change (eq. 29). Error bars for standard errors are contained within the symbols. Fixed parameters:  $N = 5000$ ,  $\sigma_m^2 = 0.05$ .

1012

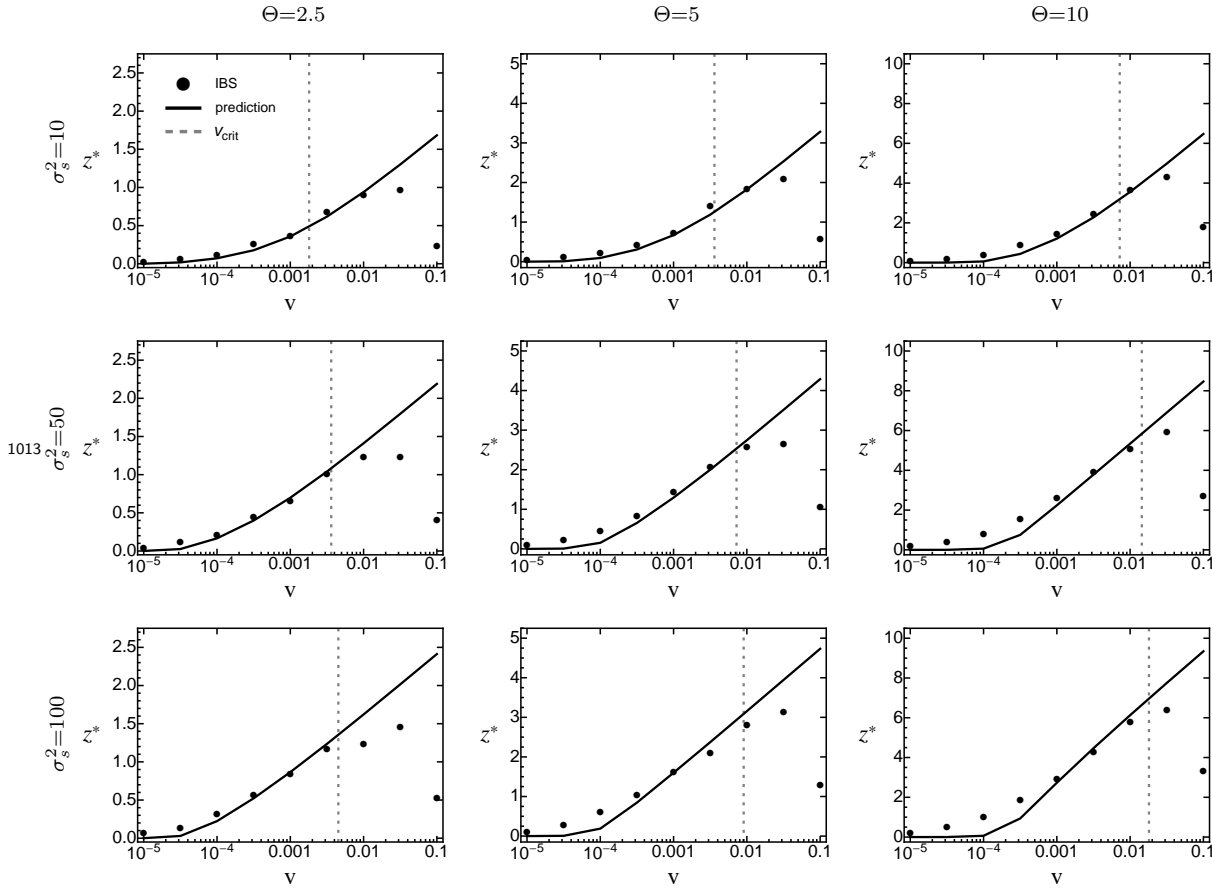

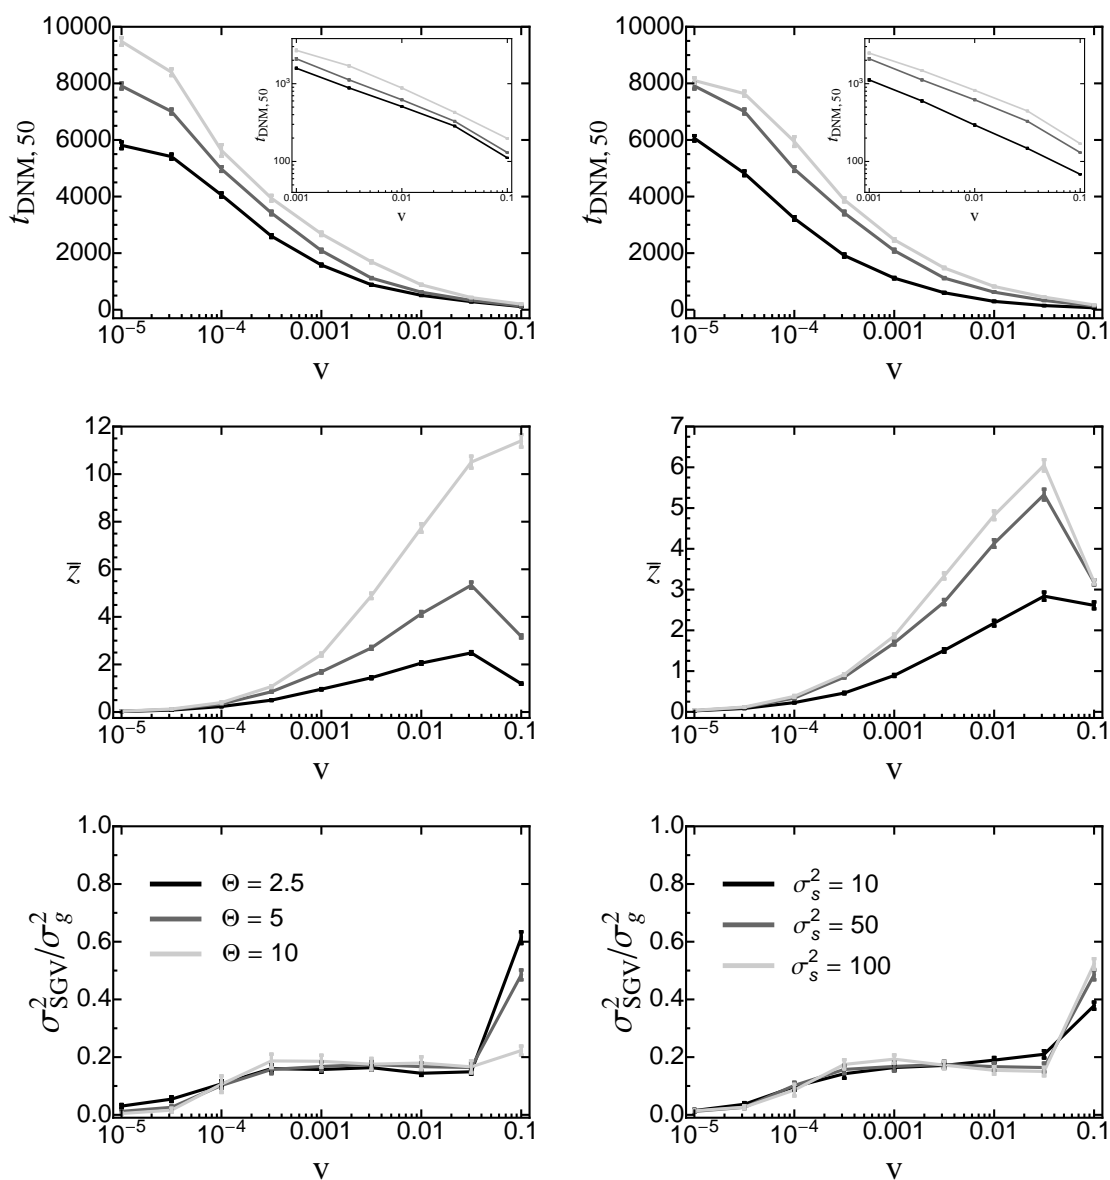

**Figure S3\_8** – First row: the point in time  $t_{\text{DNM},50}(\bar{z})$  where 50% of the phenotypic response to moving-optimum selection have been contributed by *de-novo* mutations as a function of the rate of environmental change for various values of  $\Theta$  (left) and  $\sigma_s^2$  (right). Insets show the results for large  $v$  on a log-scale. Second row: The mean total phenotypic response at this time. Third row: The relative contribution of original standing genetic variation to the total genetic variance at time  $t_{\text{DNM},50}(\bar{z})$ . Data are means and standard errors from 1000 replicate simulation runs. Fixed parameters (if not stated otherwise):  $\sigma_s^2 = 50$ ,  $\Theta = 5$ ,  $N = 1000$ ,  $\sigma_m^2 = 0.05$ .

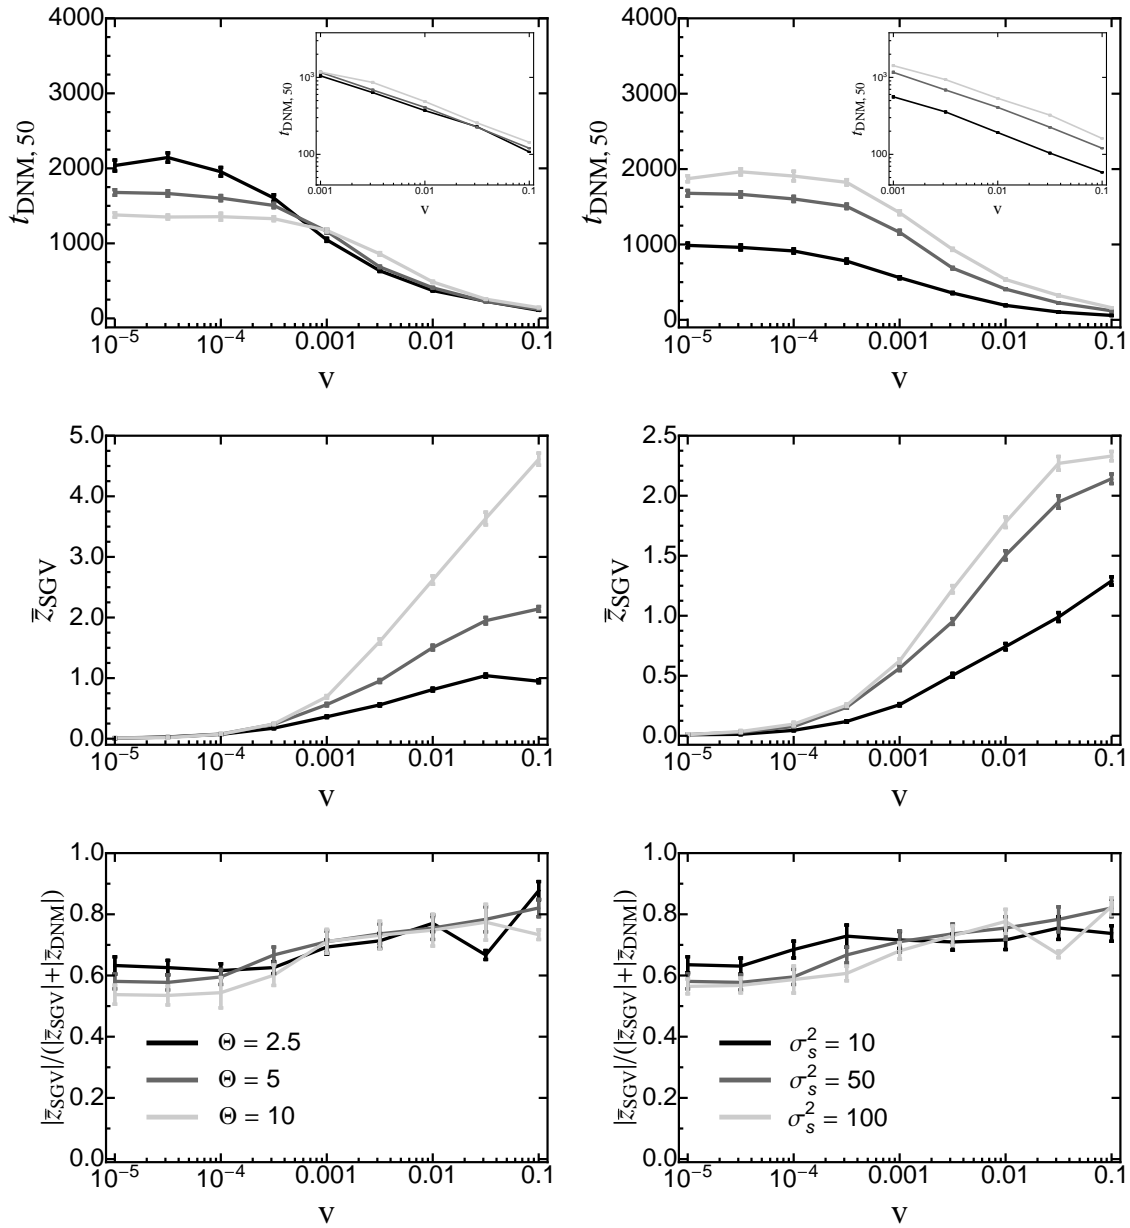

**Figure S3\_9** – First row: the point in time  $t_{\text{DNM},50}(\sigma_g^2)$  where 50% of the genetic variance is composed of *de-novo* mutations as a function of the rate of environmental change for various values of  $\Theta$  (left) and  $\sigma_s^2$  (right). Insets show the results for large  $v$  on a log-scale. Second row: The mean total phenotypic response from standing genetic variation at this time. Third row: The relative contribution of original standing genetic variation to the total genetic variance at time  $t_{\text{DNM},50}(\sigma_g^2)$ . Data are means and standard errors from 1000 replicate simulation runs. Fixed parameters (if not stated otherwise):  $\sigma_s^2 = 50$ ,  $\Theta = 5$ ,  $N = 1000$ ,  $\sigma_m^2 = 0.05$ .

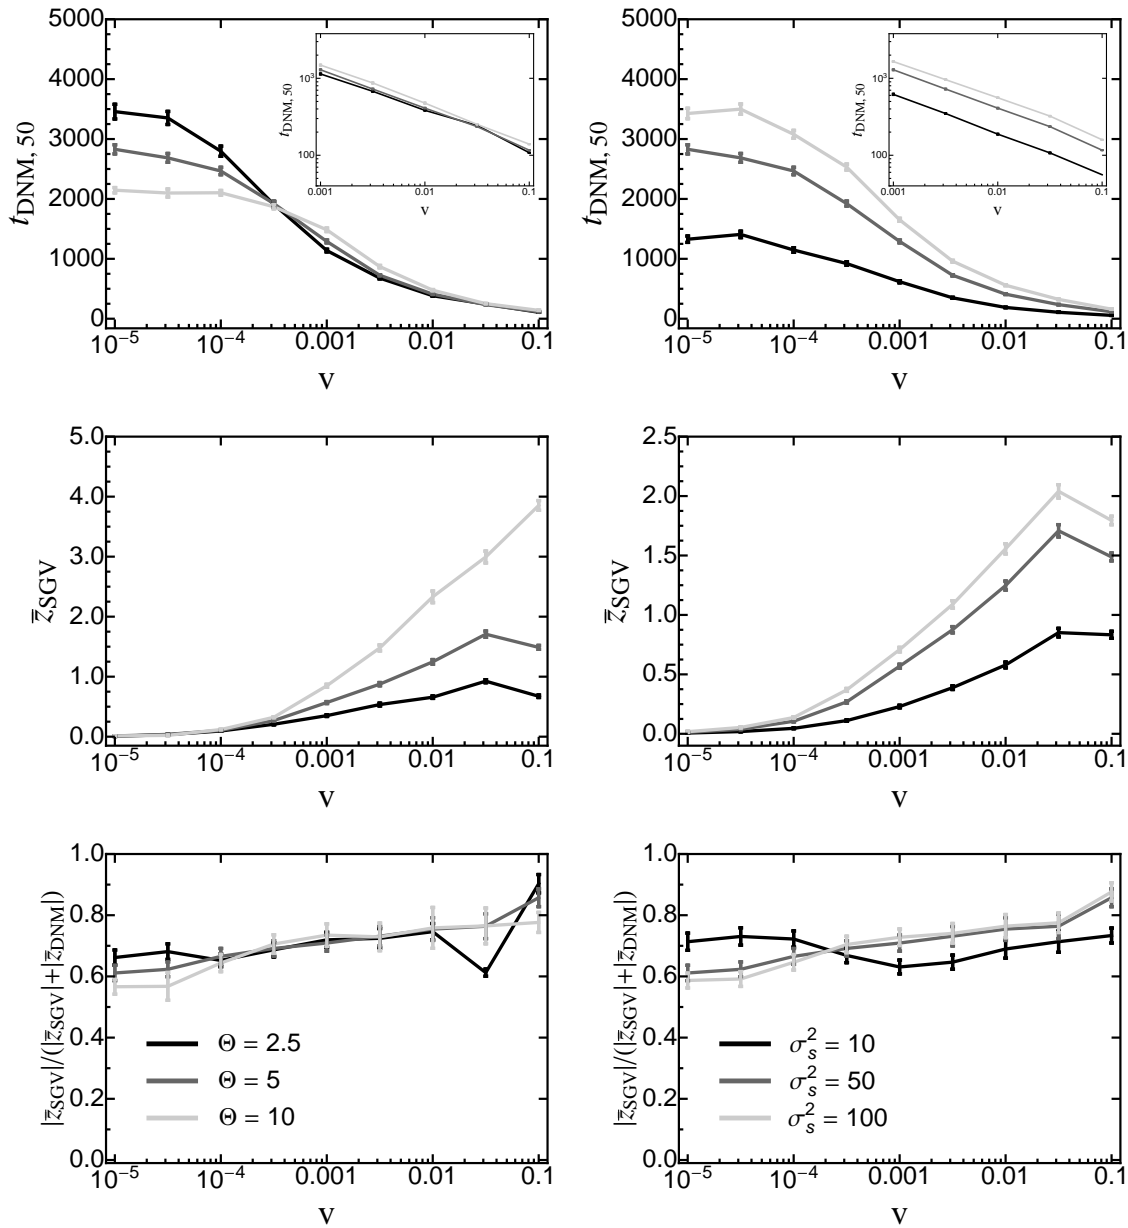

**Figure S3\_10** – First row: the point in time  $t_{\text{DNM},50}(\sigma_g^2)$  where 50% of the genetic variance is composed of *de-novo* mutations as a function of the rate of environmental change for various values of  $\Theta$  (left) and  $\sigma_s^2$  (right). Insets show the results for large  $v$  on a log-scale. Second row: The mean total phenotypic response from standing genetic variation at this time. Third row: The relative contribution of original standing genetic variation to the total genetic variance at time  $t_{\text{DNM},50}(\sigma_g^2)$ . Data are means and standard errors from 1000 replicate simulation runs. Fixed parameters (if not stated otherwise):  $\sigma_s^2 = 50$ ,  $\Theta = 5$ ,  $N = 2500$ ,  $\sigma_m^2 = 0.05$ .
